# Supplementary material for: Biodiversity intervention enhances immune regulation and health-associated commensal microbiota among daycare children
Source: PubMed Central journal article supplement (PMC7556828; doi:10.1126/sciadv.aba2578), 2020-10-14
Supplement: aba2578_SM.pdf [file aba2578_SM.pdf]

## Supplementary Materials for

### **Biodiversity intervention enhances immune regulation and health-associated commensal microbiota among daycare children**

Marja I. Roslund, Riikka Puhakka, Mira Grönroos, Noora Nurminen, Sami Oikarinen, Ahmad M. Gazali, Ondřej Cinek, Lenka Kramná, Nathan Siter, Heli K. Vari, Laura Soininen, Anirudra Parajuli, Juho Rajaniemi, Tuure Kinnunen, Olli H. Laitinen, Heikki Hyöty, Aki Sinkkonen\*, ADELE research group

\*Corresponding author. Email: [aki.sinkkonen@luke.fi](mailto:aki.sinkkonen@luke.fi)

Published 14 October 2020, *Sci. Adv.* **6**, eaba2578 (2020)  
DOI: 10.1126/sciadv.aba2578

#### **This PDF file includes:**

Tables S1 to S8  
Figs. S1 and S2

**Table S1. Characteristics of study participants.**

Kruskal-Wallis tests showed that there are no differences in days spent in daycare centers or summer cottage, sick days, outdoor recreation (Home yard, neighborhood or nature), animal contact, nutrition (berries and vegetables) and number of siblings between children in intervention, standard and nature-oriented daycares.

Days spend in daycares, summer cottage, and siblings and sick days during the intervention period are presented as mean  $\pm$  standard deviation (sd).

Outdoor recreation and animal contact during the intervention period are presented at nominal scale (median  $\pm$  confidence level 95% = cl):

1 = not at all, 2 = rarely, 3 = weekly, 4 = almost daily and 5 = daily.

Nutrition is presented at nominal scale (median  $\pm$  confidence level 95% = cl):

1 = not at all, 2 = occasionally, 3 = frequently.

|                                              | Intervention |       | Standard |       | Nature-oriented |       | Kruskal-Wallis test |         |
|----------------------------------------------|--------------|-------|----------|-------|-----------------|-------|---------------------|---------|
|                                              | Mean         | sd    | Mean     | sd    | Mean            | sd    | Chi-squared         | P value |
| Daycare days                                 | 15.800       | 3.398 | 14.333   | 2.664 | 14.864          | 3.468 | 2.169               | 0.338   |
| Sick days                                    | 0.567        | 0.898 | 1.233    | 2.499 | 0.591           | 0.908 | 0.086               | 0.958   |
| Days in summer cottage                       | 0.967        | 1.866 | 0.600    | 0.910 | 1.364           | 1.814 | 2.176               | 0.337   |
| Siblings                                     | 1.133        | 0.937 | 0.867    | 0.834 | 1.455           | 0.963 | 3.768               | 0.152   |
|                                              | Median       | cl    | Median   | cl    | Median          | cl    | Chi-squared         | P value |
| Outdoor recreation home yard                 | 4            | 0.431 | 4        | 0.700 | 5               | 0.265 | 4.166               | 0.125   |
| Outdoor recreation surrounding neighbourhood | 4            | 0.300 | 4        | 0.478 | 3               | 0.333 | 4.822               | 0.090   |
| Outdoor recreation nature                    | 3            | 0.305 | 2        | 0.412 | 2.5             | 0.380 | 1.543               | 0.462   |
| Animal contact                               | 2            | 0.261 | 2        | 0.532 | 2               | 0.237 | 2.605               | 0.272   |
| Nutrition berries                            | 2            | 0.194 | 2        | 0.310 | 2               | 0.202 | 0.160               | 0.923   |
| Nutrition vegetables                         | 2            | 0.300 | 2        | 0.390 | 2               | 0.271 | 1.533               | 0.465   |

**Table S2. Bacterial community composition (PERMANOVA) comparisons in soil (A-C), on skin (D) and in the gut (E and F) between daycare groups.** Differences in surface soil bacterial communities (A) between intervention and standard daycare centers after the intervention and (B) before-after comparisons at class level. (C) Comparison of beta-diversity of surface soil bacterial communities between intervention and standard (PERMDISP) daycare soils at genus level after the intervention period. Community composition of bacteria (D) on skin at OTU level differed between children in nature-oriented and children in standard daycares at baseline. (E) Gut Ruminococcaceae community differed between nature-oriented and standard at baseline, and after intervention period also between children in intervention and standard daycares. (F) *Faecalibacterium* community composition in the gut differed between children in nature-oriented and standard daycares after the intervention period. The leftmost panel indicates groups and time points compared. Both relative abundance (left) and presence absence data (right) were compared. PERMANOVA statistics are reported as F statistics, R2 = Coefficient of determination, probability P value and Benjamini-Hochberg adjusted P value and PERMDISP results as F statistics, mean  $\pm$  sd, P value and Benjamini-Hochberg adjusted P value.

| A) Soil: Intervention vs Standard | ABUNDANCE DATA |       |              |              | PRESENCE/ABSENCE DATA |       |              |              |
|-----------------------------------|----------------|-------|--------------|--------------|-----------------------|-------|--------------|--------------|
|                                   | F value        | R2    | P value      | P adjust*    | F value               | R2    | P value      | P adjust*    |
| OTU level                         | 2.053          | 0.079 | <b>0.024</b> | <b>0.048</b> | 2.226                 | 0.085 | <b>0.017</b> | 0.102        |
| Genus level                       | 2.368          | 0.090 | <b>0.023</b> | <b>0.048</b> | 1.729                 | 0.067 | 0.083        | 0.166        |
| Family level                      | 2.500          | 0.094 | <b>0.021</b> | <b>0.048</b> | 1.486                 | 0.058 | 0.163        | 0.244        |
| Order level                       | 2.126          | 0.081 | <b>0.049</b> | <b>0.074</b> | 1.321                 | 0.052 | 0.244        | 0.244        |
| Class level                       | 1.840          | 0.071 | 0.072        | 0.086        | 1.476                 | 0.058 | 0.227        | 0.244        |
| Phylum level                      | 1.945          | 0.075 | 0.101        | 0.101        | 2.827                 | 0.105 | 0.059        | 0.166        |
|                                   |                |       |              |              |                       |       |              |              |
| Phylum Proteobacteria             | 2.179          | 0.083 | <b>0.018</b> | <b>0.030</b> | 2.083                 | 0.080 | <b>0.022</b> | <b>0.037</b> |
| Phylum Bacteroidetes              | 2.014          | 0.077 | <b>0.011</b> | <b>0.030</b> | 2.393                 | 0.091 | <b>0.017</b> | <b>0.037</b> |
| Phylum Actinobacteria             | 2.240          | 0.085 | <b>0.014</b> | <b>0.030</b> | 2.720                 | 0.102 | <b>0.015</b> | <b>0.037</b> |
| Phylum Acidobacteria              | 2.016          | 0.077 | <b>0.024</b> | <b>0.030</b> | 1.991                 | 0.077 | <b>0.039</b> | <b>0.049</b> |
| Phylum Verrucomicrobia            | 1.544          | 0.060 | 0.084        | 0.084        | 1.615                 | 0.063 | 0.111        | 0.111        |
|                                   |                |       |              |              |                       |       |              |              |
| Class Actinobacteria              | 2.229          | 0.085 | <b>0.02</b>  | 0.055        | 2.693                 | 0.101 | <b>0.011</b> | <b>0.044</b> |
| Class Sphingobacteriia            | 1.874          | 0.072 | <b>0.038</b> | 0.084        | 2.391                 | 0.091 | <b>0.021</b> | <b>0.046</b> |
| Class Alphaproteobacteria         | 2.291          | 0.087 | <b>0.015</b> | 0.055        | 2.232                 | 0.085 | <b>0.025</b> | <b>0.046</b> |
| Class Betaproteobacteria          | 1.945          | 0.075 | 0.102        | 0.121        | 2.827                 | 0.105 | <b>0.047</b> | 0.054        |
| Class Gammaproteobacteria         | 1.497          | 0.059 | 0.138        | 0.138        | 2.159                 | 0.083 | <b>0.025</b> | <b>0.046</b> |
| Class Flavobacteriia              | 1.945          | 0.075 | 0.101        | 0.121        | 2.827                 | 0.105 | 0.056        | 0.056        |
| Class Cytophagia                  | 2.512          | 0.095 | <b>0.007</b> | 0.055        | 2.515                 | 0.095 | <b>0.012</b> | <b>0.044</b> |
| Class Acidobacteria Gp4           | 1.945          | 0.075 | 0.082        | 0.121        | 2.827                 | 0.105 | <b>0.047</b> | 0.054        |
| Class Deltaproteobacteria         | 1.794          | 0.070 | <b>0.01</b>  | 0.055        | 2.059                 | 0.079 | <b>0.011</b> | <b>0.044</b> |
| Class Spartobacteria              | 1.945          | 0.075 | 0.089        | 0.121        | 2.827                 | 0.105 | <b>0.044</b> | 0.054        |

|                                              |                       |                 |                |                     |                              |                |                  |                              |             |                     |             |           |                |                  |
|----------------------------------------------|-----------------------|-----------------|----------------|---------------------|------------------------------|----------------|------------------|------------------------------|-------------|---------------------|-------------|-----------|----------------|------------------|
| Class Gemmatimonadetes                       | 1.945                 | 0.075           | 0.11           | 0.121               | 2.827                        | 0.105          | <b>0.049</b>     | 0.054                        |             |                     |             |           |                |                  |
| Order Actinomycetales                        | 2.202                 | 0.084           | <b>0.021</b>   | 0.063               | 2.763                        | 0.103          | <b>0.008</b>     | <b>0.038</b>                 |             |                     |             |           |                |                  |
| Order Sphingobacteriales                     | 1.874                 | 0.072           | <b>0.037</b>   | 0.067               | 2.391                        | 0.091          | <b>0.015</b>     | <b>0.038</b>                 |             |                     |             |           |                |                  |
| Order Flavobacteriales                       | 0.987                 | 0.040           | 0.456          | 0.497               | 1.704                        | 0.066          | 0.073            | 0.110                        |             |                     |             |           |                |                  |
| Order Cytophagales                           | 2.512                 | 0.095           | <b>0.006</b>   | 0.063               | 2.515                        | 0.095          | <b>0.016</b>     | <b>0.038</b>                 |             |                     |             |           |                |                  |
| Order Xanthomonadales                        | 1.627                 | 0.063           | 0.075          | 0.090               | 2.303                        | 0.088          | <b>0.030</b>     | 0.051                        |             |                     |             |           |                |                  |
| Order Rhizobiales                            | 2.398                 | 0.091           | <b>0.013</b>   | 0.063               | 2.292                        | 0.087          | <b>0.012</b>     | <b>0.038</b>                 |             |                     |             |           |                |                  |
| Order Rhodospirillales                       | 2.395                 | 0.091           | <b>0.017</b>   | 0.063               | 2.985                        | 0.111          | <b>0.007</b>     | <b>0.038</b>                 |             |                     |             |           |                |                  |
| Order Spartobacteria unclassified            | 1.829                 | 0.071           | <b>0.039</b>   | 0.067               | 2.356                        | 0.089          | <b>0.024</b>     | <b>0.048</b>                 |             |                     |             |           |                |                  |
|                                              | <b>ABUNDANCE DATA</b> |                 |                |                     | <b>PRESENCE/ABSENCE DATA</b> |                |                  |                              |             |                     |             |           |                |                  |
| <b>B) Soil: Intervention before vs after</b> | <b>F value</b>        | <b>R2</b>       | <b>P value</b> | <b>P adjust*</b>    | <b>F value</b>               | <b>R2</b>      | <b>P value</b>   | <b>P adjust*</b>             |             |                     |             |           |                |                  |
| Class Actinobacteria                         | 2.319                 | 0.072           | <b>0.011</b>   | <b>0.030</b>        | 2.243                        | 0.070          | <b>0.016</b>     | 0.059                        |             |                     |             |           |                |                  |
| Class Sphingobacteriia                       | 2.255                 | 0.070           | <b>0.011</b>   | <b>0.030</b>        | 2.037                        | 0.064          | <b>0.043</b>     | 0.079                        |             |                     |             |           |                |                  |
| Class Alphaproteobacteria                    | 2.073                 | 0.065           | <b>0.018</b>   | <b>0.040</b>        | 1.872                        | 0.059          | <b>0.035</b>     | 0.077                        |             |                     |             |           |                |                  |
| Class Betaproteobacteria                     | 1.603                 | 0.051           | 0.153          | 0.153               | 2.046                        | 0.064          | 0.133            | 0.147                        |             |                     |             |           |                |                  |
| Class Gammaproteobacteria                    | 2.250                 | 0.070           | <b>0.008</b>   | <b>0.030</b>        | 2.329                        | 0.072          | <b>0.011</b>     | 0.059                        |             |                     |             |           |                |                  |
| Class Flavobacteriia                         | 1.603                 | 0.051           | 0.148          | 0.153               | 2.046                        | 0.064          | 0.132            | 0.147                        |             |                     |             |           |                |                  |
| Class Cytophagia                             | 1.706                 | 0.054           | <b>0.042</b>   | 0.077               | 2.128                        | 0.066          | <b>0.025</b>     | 0.069                        |             |                     |             |           |                |                  |
| Class Acidobacteria Gp4                      | 1.603                 | 0.051           | 0.143          | 0.153               | 2.046                        | 0.064          | 0.147            | 0.147                        |             |                     |             |           |                |                  |
| Class Deltaproteobacteria                    | 2.059                 | 0.064           | <b>0.002</b>   | <b>0.022</b>        | 2.741                        | 0.084          | <b>0.001</b>     | <b>0.011</b>                 |             |                     |             |           |                |                  |
| Class Spartobacteria                         | 1.603                 | 0.051           | 0.137          | 0.153               | 2.046                        | 0.064          | 0.147            | 0.147                        |             |                     |             |           |                |                  |
| Class Gemmatimonadetes                       | 1.603                 | 0.051           | 0.149          | 0.153               | 2.046                        | 0.064          | 0.136            | 0.147                        |             |                     |             |           |                |                  |
| <b>C) PERMDISP</b>                           | <b>ABUNDANCE DATA</b> |                 |                |                     |                              |                |                  | <b>PRESENCE/ABSENCE DATA</b> |             |                     |             |           |                |                  |
| <b>SOIL</b>                                  |                       | <b>Standard</b> |                | <b>Intervention</b> |                              |                |                  | <b>Standard</b>              |             | <b>Intervention</b> |             |           |                |                  |
| <b>Intervention vs Standard</b>              | <b>F</b>              | <b>Mean</b>     | <b>sd</b>      | <b>Mean</b>         | <b>sd</b>                    | <b>P value</b> | <b>P adjust*</b> | <b>F</b>                     | <b>Mean</b> | <b>sd</b>           | <b>Mean</b> | <b>sd</b> | <b>P value</b> | <b>P adjust*</b> |
| Actinomycetales unclassified                 | 23.2                  | 0.6             | 0.1            | 0.4                 | 0.1                          | <b>0.001</b>   | <b>0.026</b>     | 28.7                         | 0.6         | 0.1                 | 0.3         | 0.1       | <b>0.001</b>   | <b>0.026</b>     |
| Hymenobacter                                 | 12.7                  | 0.5             | 0.2            | 0.3                 | 0.1                          | <b>0.003</b>   | <b>0.035</b>     | 6.5                          | 0.5         | 0.2                 | 0.3         | 0.1       | <b>0.008</b>   | 0.069            |
| Noviherbaspirillum                           | 13.6                  | 0.5             | 0.2            | 0.2                 | 0.1                          | <b>0.004</b>   | <b>0.035</b>     | 0.1                          | 0.1         | 0.3                 | 0.1         | 0.2       | 0.718          | 0.849            |
| Sphingomonas                                 | 7.5                   | 0.5             | 0.2            | 0.3                 | 0.1                          | <b>0.009</b>   | <b>0.047</b>     | 3.4                          | 0.4         | 0.2                 | 0.3         | 0.1       | 0.076          | 0.395            |
| Marmoricola                                  | 6.7                   | 0.4             | 0.2            | 0.2                 | 0.2                          | <b>0.009</b>   | <b>0.047</b>     | 0.1                          | 0.1         | 0.2                 | 0.1         | 0.2       | 0.806          | 0.873            |
| Massilia                                     | 6.1                   | 0.4             | 0.2            | 0.3                 | 0.1                          | <b>0.016</b>   | 0.069            | 0.6                          | 0.2         | 0.2                 | 0.2         | 0.1       | 0.54           | 0.78             |
| Chitinophagaceae unclassified                | 1.4                   | 0.5             | 0.1            | 0.5                 | 0.2                          | 0.277          | 0.463            | 1.4                          | 0.5         | 0.2                 | 0.4         | 0.1       | 0.262          | 0.56             |
| Nocardioides                                 | 1.3                   | 0.5             | 0.2            | 0.4                 | 0.2                          | 0.282          | 0.463            | 0.5                          | 0.4         | 0.2                 | 0.3         | 0.1       | 0.489          | 0.748            |
| Arthrobacter                                 | 1.8                   | 0.4             | 0.2            | 0.3                 | 0.2                          | 0.198          | 0.463            | 1.9                          | 0.2         | 0.1                 | 0.2         | 0.2       | 0.186          | 0.56             |
| Intrasporangiaceae unclassified              | 1.5                   | 0.4             | 0.3            | 0.3                 | 0.2                          | 0.223          | 0.463            | 1.3                          | 0.3         | 0.2                 | 0.2         | 0.1       | 0.276          | 0.56             |
| Halomonas                                    | 1.5                   | 0.4             | 0.3            | 0.3                 | 0.2                          | 0.214          | 0.463            | 1.3                          | 0.3         | 0.2                 | 0.2         | 0.1       | 0.28           | 0.56             |
| Chryseobacterium                             | 1.2                   | 0.6             | 0.2            | 0.6                 | 0.2                          | 0.307          | 0.463            | 0.2                          | 0.4         | 0.2                 | 0.4         | 0.3       | 0.682          | 0.849            |
| Burkholderiales unclassified                 | 1.2                   | 0.4             | 0.2            | 0.3                 | 0.2                          | 0.298          | 0.463            | 5.1                          | 0.4         | 0.1                 | 0.3         | 0.2       | 0.032          | 0.208            |
| Xanthomonadaceae unclassified                | 1.7                   | 0.5             | 0.2            | 0.6                 | 0.2                          | 0.201          | 0.463            | 0                            | 0.5         | 0.1                 | 0.5         | 0.2       | 0.989          | 0.989            |
| Microbacteriaceae unclassified               | 0.9                   | 0.4             | 0.2            | 0.3                 | 0.1                          | 0.338          | 0.463            | 15.6                         | 0.4         | 0.1                 | 0.3         | 0.1       | 0.004          | 0.052            |
| Sphingomonadaceae unclassified               | 1.1                   | 0.6             | 0.1            | 0.6                 | 0.2                          | 0.305          | 0.463            | 1.4                          | 0.6         | 0.2                 | 0.5         | 0.5       | 0.249          | 0.56             |
| Betaproteobacteria unclassified              | 2.5                   | 0.6             | 0.1            | 0.6                 | 0.2                          | 0.135          | 0.463            | 1.0                          | 0.5         | 0.2                 | 0.5         | 0.2       | 0.353          | 0.612            |
| Comamonadaceae unclassified                  | 0.7                   | 0.5             | 0.2            | 0.4                 | 0.2                          | 0.396          | 0.515            | 0.7                          | 0.3         | 0.2                 | 0.3         | 0.2       | 0.404          | 0.657            |

|                             |     |     |     |     |     |       |       |     |     |     |     |     |       |       |
|-----------------------------|-----|-----|-----|-----|-----|-------|-------|-----|-----|-----|-----|-----|-------|-------|
| Pseudomonas                 | 0.5 | 0.5 | 0.2 | 0.6 | 0.2 | 0.488 | 0.604 | 0.3 | 0.3 | 0.3 | 0.4 | 0.4 | 0.605 | 0.828 |
| Pedobacter                  | 0.1 | 0.5 | 0.1 | 0.5 | 0.1 | 0.7   | 0.827 | 1.6 | 0.4 | 0.2 | 0.3 | 0.1 | 0.215 | 0.56  |
| Ferruginibacter             | 0.1 | 0.6 | 0.1 | 0.6 | 0.2 | 0.757 | 0.856 | 0.1 | 0.5 | 0.2 | 0.4 | 0.2 | 0.801 | 0.873 |
| Flavobacterium              | 0.0 | 0.5 | 0.2 | 0.5 | 0.2 | 0.851 | 0.899 | 0.8 | 0.5 | 0.2 | 0.4 | 0.2 | 0.352 | 0.612 |
| Spartobacteria unclassified | 0.0 | 0.6 | 0.1 | 0.6 | 0.2 | 0.864 | 0.899 | 1.5 | 0.5 | 0.1 | 0.5 | 0.2 | 0.262 | 0.56  |

| D) Skin: OTU level. baseline    | Abundance data |       |         | Presence/absence data |       |              | P adjust |
|---------------------------------|----------------|-------|---------|-----------------------|-------|--------------|----------|
|                                 | F value        | R2    | P value | F value               | R2    | P value      |          |
| Intervention vs standard        | 0.986          | 0.021 | 0.456   | 0.946                 | 0.020 | 0.555        | 0.555    |
| Intervention vs nature-oriented | 1.321          | 0.025 | 0.060   | 1.388                 | 0.026 | 0.070        | 0.105    |
| Nature-oriented vs standard     | 1.241          | 0.040 | 0.102   | 1.474                 | 0.047 | <b>0.025</b> | 0.075    |

| E) Gut: Family Ruminococcaceae  | Abundance data |       |              |              | Presence/absence data |       |              |           |
|---------------------------------|----------------|-------|--------------|--------------|-----------------------|-------|--------------|-----------|
|                                 | F value        | R2    | P value      | P adjust*    | F value               | R2    | P value      | P adjust* |
| Intervention before vs after    | 0.528          | 0.010 | 0.871        |              | 0.389                 | 0.007 | 0.919        |           |
| Standard before vs after        | 0.530          | 0.021 | 0.895        |              | 0.532                 | 0.021 | 0.808        |           |
| Nature before vs after          | 0.174          | 0.005 | 0.997        |              | 0.357                 | 0.010 | 0.903        |           |
| Nature vs Standard before       | 1.928          | 0.057 | <b>0.047</b> | 0.101        | 2.448                 | 0.071 | <b>0.020</b> | 0.079     |
| Intervention vs Standard before | 1.473          | 0.036 | 0.143        |              | 1.052                 | 0.026 | 0.409        |           |
| Nature vs Intervention before   | 0.511          | 0.011 | 0.881        |              | 1.757                 | 0.037 | 0.093        |           |
| Nature vs Standard after        | 2.265          | 0.070 | <b>0.010</b> | <b>0.030</b> | 1.222                 | 0.039 | 0.301        |           |
| Intervention vs Standard after  | 1.942          | 0.049 | <b>0.027</b> | 0.081        | 1.463                 | 0.037 | 0.163        |           |
| Nature vs Intervention after    | 0.644          | 0.014 | 0.793        |              | 0.613                 | 0.014 | 0.777        |           |

| F) Gut: Genus Faecalibacterium** | Abundance data |       |              | Presence/absence data |        |         |
|----------------------------------|----------------|-------|--------------|-----------------------|--------|---------|
|                                  | F value        | R2    | P value      | F value               | R2     | P value |
| Intervention before vs after     | 0.158          | 0.003 | 0.943        | -0.027                | -0.001 | 0.876   |
| Standard before vs after         | 1.293          | 0.049 | 0.261        | 1.122                 | 0.043  | 0.474   |
| Nature before vs after           | 0.310          | 0.008 | 0.813        | 0.543                 | 0.014  | 0.792   |
| Nature vs Standard before        | 1.705          | 0.051 | 0.185        | 1.554                 | 0.046  | 0.272   |
| Intervention vs Standard before  | 1.705          | 0.041 | 0.136        | 1.362                 | 0.033  | 0.317   |
| Nature vs Intervention before    | 0.492          | 0.011 | 0.770        | -0.692                | -0.015 | 0.968   |
| Nature vs Standard after         | 3.233          | 0.097 | <b>0.030</b> | 0.150                 | 0.005  | 1.000   |
| Intervention vs Standard after   | 2.288          | 0.057 | 0.086        | 0.240                 | 0.006  | 0.795   |
| Nature vs Intervention after     | 0.669          | 0.015 | 0.592        | 0.116                 | 0.003  | 0.950   |

\*Benjamini-Hochberg correction

\*\**Faecalibacterium* was the sole genus analyzed

**Table S3.** Comparison of bacterial (A) relative abundance at genus level between intervention and standard daycare center surface soils and (B) between baseline and day-28 at intervention daycare yards (Wilcoxon signed-rank test). (C) Comparison of bacterial richness and diversity between intervention and standard daycare center surface soils at total bacterial and class levels (t-test). Data is shown as mean  $\pm$  standard deviation = sd.

| A) Intervention vs standard, Degrees of Freedom = 23 | Mean standard | sd    | Mean intervention | sd    | Statistic | P value      | P adjust |
|------------------------------------------------------|---------------|-------|-------------------|-------|-----------|--------------|----------|
| Flavobacterium                                       | 134.3         | 102.0 | 233.0             | 168.4 | 108.0     | 0.147        | 0.491    |
| Chitinophagaceae unclassified                        | 261.1         | 123.6 | 202.1             | 72.9  | 51.5      | 0.140        | 0.484    |
| Sphingomonas                                         | 208.6         | 47.3  | 159.8             | 108.3 | 50.5      | 0.126        | 0.484    |
| Massilia                                             | 231.4         | 96.9  | 141.9             | 114.9 | 45.0      | 0.069        | 0.365    |
| Hymenobacter                                         | 193.7         | 76.1  | 114.9             | 125.2 | 45.0      | 0.069        | 0.365    |
| Ferruginibacter                                      | 185.9         | 110.5 | 112.4             | 82.2  | 46.0      | 0.077        | 0.367    |
| Mucilaginibacter                                     | 18.3          | 28.3  | 94.6              | 164.6 | 106.0     | 0.178        | 0.494    |
| Pedobacter                                           | 82.4          | 62.3  | 90.4              | 83.2  | 82.0      | 0.937        | 1.000    |
| Spartobacteria unclassified                          | 22.7          | 18.0  | 81.9              | 90.5  | 118.0     | 0.048        | 0.300    |
| Nocardioides                                         | 84.6          | 37.3  | 76.1              | 51.6  | 74.0      | 0.772        | 0.963    |
| Gammaproteobacteria unclassified                     | 8.3           | 6.1   | 64.7              | 77.2  | 137.0     | <b>0.003</b> | 0.052    |
| Arthrobacter                                         | 71.3          | 61.0  | 63.3              | 79.4  | 58.0      | 0.257        | 0.578    |
| Betaproteobacteria unclassified                      | 28.6          | 21.9  | 61.8              | 92.7  | 81.5      | 0.958        | 1.000    |
| Burkholderiales unclassified                         | 58.3          | 23.6  | 61.0              | 33.0  | 77.0      | 0.895        | 1.000    |
| Chryseobacterium                                     | 122.1         | 263.5 | 55.1              | 76.2  | 87.5      | 0.712        | 0.942    |
| Intrasporangiaceae unclassified                      | 63.9          | 27.3  | 50.6              | 30.2  | 60.5      | 0.317        | 0.678    |
| Xanthomonadaceae unclassified                        | 47.7          | 69.6  | 49.8              | 37.3  | 103.5     | 0.225        | 0.563    |
| Microbacteriaceae unclassified                       | 43.1          | 19.1  | 47.4              | 36.5  | 78.5      | 0.958        | 1.000    |
| Comamonadaceae unclassified                          | 48.4          | 17.0  | 45.5              | 23.4  | 77.0      | 0.895        | 1.000    |
| Actinomycetales unclassified                         | 46.5          | 22.6  | 40.6              | 36.9  | 51.5      | 0.140        | 0.484    |
| Luteolibacter                                        | 27.4          | 23.3  | 40.1              | 39.0  | 91.5      | 0.561        | 0.901    |
| Cryobacterium                                        | 40.8          | 26.7  | 39.8              | 45.8  | 63.0      | 0.384        | 0.780    |
| Aridibacter unclassified                             | 50.8          | 30.4  | 39.7              | 35.8  | 63.5      | 0.399        | 0.780    |
| Sphingomonadaceae unclassified                       | 47.4          | 23.1  | 39.0              | 18.9  | 66.0      | 0.476        | 0.874    |
| Myxococcales unclassified                            | 25.4          | 21.8  | 35.8              | 35.7  | 89.0      | 0.654        | 0.942    |
| Gp6 unclassified                                     | 17.8          | 12.3  | 35.6              | 55.8  | 80.0      | 1.000        | 1.000    |
| Oxalobacteraceae unclassified                        | 46.4          | 27.0  | 34.4              | 26.6  | 58.0      | 0.257        | 0.578    |
| Mycobacterium                                        | 7.1           | 4.7   | 33.8              | 31.4  | 140.5     | 0.002        | 0.052    |
| Bacteroidetes unclassified                           | 21.6          | 20.5  | 33.1              | 28.4  | 102.5     | 0.246        | 0.578    |
| Granulicella unclassified                            | 6.7           | 16.5  | 32.9              | 76.1  | 79.0      | 0.975        | 1.000    |
| Clostridium sensu stricto                            | 5.7           | 4.9   | 32.9              | 56.0  | 120.5     | <b>0.035</b> | 0.240    |
| Bradyrhizobium                                       | 14.0          | 8.6   | 32.8              | 22.1  | 121.0     | <b>0.033</b> | 0.240    |
| Acidobacteria Gp1 unclassified                       | 2.8           | 3.1   | 31.4              | 63.3  | 74.0      | 0.762        | 0.963    |
| Marmoricola                                          | 49.5          | 15.0  | 30.1              | 27.6  | 38.5      | <b>0.031</b> | 0.240    |
| Gemmatimonas                                         | 56.0          | 42.5  | 30.0              | 30.6  | 53.5      | 0.170        | 0.494    |
| Noviherbaspirillum                                   | 80.0          | 34.3  | 29.9              | 32.7  | 20.5      | <b>0.002</b> | 0.052    |
| Rhizobiales unclassified                             | 24.5          | 18.0  | 28.5              | 26.2  | 74.5      | 0.792        | 0.963    |
| Burkholderia                                         | 4.0           | 6.1   | 26.2              | 53.7  | 92.0      | 0.537        | 0.901    |

|                                       |      |      |      |      |       |              |       |
|---------------------------------------|------|------|------|------|-------|--------------|-------|
| Polaromonas                           | 22.3 | 20.7 | 24.8 | 21.1 | 85.5  | 0.792        | 0.963 |
| Alphaproteobacteria unclassified      | 5.9  | 6.0  | 24.5 | 31.3 | 110.0 | 0.119        | 0.484 |
| Novosphingobium                       | 24.0 | 15.3 | 23.7 | 23.3 | 70.5  | 0.635        | 0.942 |
| Spirosoma                             | 46.0 | 31.2 | 23.6 | 25.8 | 50.5  | 0.124        | 0.484 |
| Gp3 unclassified                      | 12.1 | 10.7 | 23.4 | 28.6 | 88.5  | 0.672        | 0.942 |
| Pseudomonas                           | 27.7 | 30.7 | 22.9 | 30.9 | 68.0  | 0.544        | 0.901 |
| Actinobacteria unclassified           | 11.4 | 8.5  | 22.7 | 16.0 | 117.5 | <b>0.050</b> | 0.300 |
| Arenimonas                            | 26.0 | 18.3 | 22.6 | 22.1 | 71.5  | 0.672        | 0.942 |
| Sinobacteraceae unclassified          | 14.4 | 19.3 | 21.9 | 28.6 | 89.0  | 0.653        | 0.942 |
| Planctomycetaceae unclassified        | 4.2  | 4.4  | 20.6 | 19.6 | 123.0 | 0.025        | 0.227 |
| Brevundimonas                         | 15.2 | 29.2 | 20.2 | 23.0 | 100.0 | 0.303        | 0.665 |
| Proteobacteria unclassified           | 19.0 | 7.2  | 20.1 | 17.9 | 73.5  | 0.751        | 0.963 |
| Gaiella                               | 8.5  | 6.2  | 18.3 | 29.2 | 79.0  | 0.979        | 1.000 |
| candidate division WPS.1 unclassified | 8.7  | 10.0 | 18.0 | 17.8 | 106.5 | 0.169        | 0.494 |
| Acidobacteria Gp4 unclassified        | 23.8 | 16.7 | 17.9 | 15.5 | 64.0  | 0.413        | 0.791 |
| Blastocatella unclassified            | 20.1 | 8.0  | 16.8 | 35.2 | 33.0  | <b>0.014</b> | 0.159 |
| Duganella                             | 21.4 | 14.3 | 16.7 | 15.7 | 58.0  | 0.256        | 0.578 |
| Terrimonas                            | 7.7  | 6.1  | 16.6 | 19.4 | 96.5  | 0.398        | 0.780 |
| Nakamurella                           | 19.2 | 13.8 | 16.5 | 9.2  | 77.5  | 0.916        | 1.000 |
| Subdivision3 unclassified             | 6.7  | 7.2  | 15.4 | 18.5 | 93.0  | 0.501        | 0.874 |
| Opiritatus                            | 6.3  | 6.1  | 14.9 | 21.0 | 98.5  | 0.340        | 0.712 |
| Cytophagales unclassified             | 16.1 | 10.9 | 14.6 | 20.2 | 54.0  | 0.178        | 0.494 |
| Roseomonas                            | 24.5 | 13.9 | 14.4 | 14.7 | 47.5  | 0.091        | 0.410 |
| Acidobacteria Gp3 unclassified        | 0.8  | 8.8  | 14.1 | 20.5 | 76.0  | 0.853        | 1.000 |
| Dyadobacter                           | 10.1 | 15.1 | 13.7 | 18.6 | 93.5  | 0.489        | 0.874 |
| Cellvibrio                            | 20.4 | 29.9 | 13.6 | 12.7 | 78.0  | 0.937        | 1.000 |
| Acetobacteraceae unclassified         | 35.4 | 58.8 | 13.6 | 20.7 | 55.5  | 0.205        | 0.526 |
| Gp4 unclassified                      | 4.6  | 8.2  | 13.3 | 40.4 | 76.5  | 0.869        | 1.000 |
| Rhizobium                             | 11.2 | 6.0  | 12.2 | 9.7  | 78.0  | 0.937        | 1.000 |
| Rhodopseudomonas                      | 17.6 | 7.0  | 12.1 | 10.4 | 51.5  | 0.140        | 0.484 |
| Nocardoidaceae unclassified           | 10.9 | 9.8  | 12.1 | 10.2 | 80.5  | 1.000        | 1.000 |
| Flavisolibacter                       | 38.3 | 21.4 | 12.0 | 13.7 | 22.5  | <b>0.003</b> | 0.052 |
| Caulobacter                           | 11.3 | 6.4  | 11.5 | 9.7  | 78.0  | 0.937        | 1.000 |
| Conexibacter                          | 8.2  | 8.6  | 11.1 | 15.1 | 72.0  | 0.690        | 0.942 |
| Chryseolinea unclassified             | 7.8  | 7.5  | 11.1 | 12.3 | 89.5  | 0.634        | 0.942 |
| Roseiarcus                            | 0.1  | 0.3  | 10.4 | 23.7 | 99.0  | 0.187        | 0.494 |
| Pseudoxanthomonas                     | 1.5  | 2.3  | 10.0 | 8.6  | 134.5 | <b>0.004</b> | 0.052 |
| Deltaproteobacteria unclassified      | 7.8  | 5.2  | 9.9  | 13.2 | 73.5  | 0.751        | 0.963 |
| Cellulomonas                          | 6.5  | 5.3  | 8.6  | 6.9  | 91.5  | 0.560        | 0.901 |
| Phenylobacterium                      | 7.5  | 5.9  | 8.1  | 9.6  | 72.0  | 0.691        | 0.942 |
| Chloroflexi unclassified              | 2.6  | 2.9  | 7.5  | 8.5  | 105.5 | 0.183        | 0.494 |
| Micromonosporaceae unclassified       | 17.0 | 9.2  | 7.5  | 9.4  | 24.0  | <b>0.003</b> | 0.052 |
| Actinoplanes                          | 5.2  | 5.7  | 7.2  | 14.6 | 67.0  | 0.505        | 0.874 |
| Gp7 unclassified                      | 5.0  | 7.6  | 7.1  | 19.0 | 70.0  | 0.592        | 0.935 |
| Hyphomicrobium                        | 2.0  | 1.8  | 6.6  | 10.7 | 112.0 | 0.076        | 0.367 |
| Cytophaga                             | 9.9  | 14.6 | 6.5  | 10.4 | 72.5  | 0.708        | 0.942 |

|                                                                              |                      |           |                    |           |                  |                |                 |
|------------------------------------------------------------------------------|----------------------|-----------|--------------------|-----------|------------------|----------------|-----------------|
| Segetibacter                                                                 | 33.6                 | 30.8      | 5.8                | 7.9       | 25.0             | <b>0.004</b>   | 0.052           |
| Moraxellaceae unclassified                                                   | 3.1                  | 6.6       | 5.7                | 14.7      | 87.5             | 0.674          | 0.942           |
| Sphingomonadales unclassified                                                | 14.4                 | 9.7       | 5.7                | 7.7       | 37.5             | 0.025          | 0.227           |
| Rhizomicrobium unclassified                                                  | 0.0                  | 0.0       | 5.3                | 11.7      | 95.0             | 0.169          | 0.494           |
| Solirubrobacterales unclassified                                             | 9.0                  | 11.3      | 5.2                | 7.1       | 66.0             | 0.473          | 0.874           |
| Solirubrobacter                                                              | 2.8                  | 2.6       | 5.1                | 7.9       | 78.0             | 0.935          | 1.000           |
| <b>B) Intervention yards baseline vs day-28,<br/>Degrees of Freedom = 31</b> | <b>Mean baseline</b> | <b>sd</b> | <b>Mean day-28</b> | <b>sd</b> | <b>Statistic</b> | <b>P value</b> | <b>P adjust</b> |
| Flavobacterium                                                               | 171.8                | 145.6     | 233.0              | 168.4     | 80.0             | 0.552          | 0.869           |
| Chitinophagaceae unclassified                                                | 213.6                | 72.3      | 202.1              | 72.9      | 48.5             | 0.326          | 0.606           |
| Bacteria unclassified                                                        | 206.0                | 157.4     | 180.2              | 66.4      | 57.0             | 0.587          | 0.870           |
| Sphingomonas                                                                 | 155.8                | 77.2      | 159.8              | 108.3     | 73.0             | 0.816          | 0.970           |
| Massilia                                                                     | 86.9                 | 46.8      | 141.9              | 114.9     | 91.0             | 0.245          | 0.584           |
| Hymenobacter                                                                 | 100.1                | 72.5      | 114.9              | 125.2     | 68.0             | 1.000          | 1.000           |
| Ferruginibacter                                                              | 123.7                | 69.6      | 112.4              | 82.2      | 60.0             | 0.698          | 0.933           |
| Mucilaginibacter                                                             | 7.9                  | 9.1       | 94.6               | 164.6     | 102.0            | <b>0.018</b>   | 0.279           |
| Pedobacter                                                                   | 65.1                 | 44.7      | 90.4               | 83.2      | 70.5             | 0.570          | 0.869           |
| Spartobacteria unclassified                                                  | 27.3                 | 53.0      | 81.9               | 90.5      | 111.0            | <b>0.028</b>   | 0.280           |
| Nocardioides                                                                 | 123.5                | 60.6      | 76.1               | 51.6      | 24.0             | <b>0.024</b>   | 0.279           |
| Gammaproteobacteria unclassified                                             | 14.9                 | 12.3      | 64.7               | 77.2      | 109.0            | <b>0.036</b>   | 0.290           |
| Arthrobacter                                                                 | 89.4                 | 67.4      | 63.3               | 79.4      | 43.0             | 0.205          | 0.566           |
| Betaproteobacteria unclassified                                              | 30.2                 | 40.5      | 61.8               | 92.7      | 83.0             | 0.453          | 0.740           |
| Burkholderiales unclassified                                                 | 56.1                 | 29.7      | 61.0               | 33.0      | 64.5             | 0.877          | 0.970           |
| Chryseobacterium                                                             | 34.9                 | 60.9      | 55.1               | 76.2      | 95.5             | 0.162          | 0.500           |
| Intrasporangiaceae unclassified                                              | 98.3                 | 70.3      | 50.6               | 30.2      | 26.0             | <b>0.032</b>   | 0.283           |
| Xanthomonadaceae unclassified                                                | 65.5                 | 45.2      | 49.8               | 37.3      | 46.5             | 0.277          | 0.584           |
| Microbacteriaceae unclassified                                               | 44.3                 | 36.7      | 47.4               | 36.5      | 79.5             | 0.569          | 0.869           |
| Comamonadaceae unclassified                                                  | 45.6                 | 20.8      | 45.5               | 23.4      | 68.5             | 1.000          | 1.000           |
| Actinomycetales unclassified                                                 | 53.3                 | 64.1      | 40.6               | 36.9      | 62.5             | 0.796          | 0.970           |
| Luteolibacter                                                                | 24.9                 | 21.6      | 40.1               | 39.0      | 91.5             | 0.234          | 0.584           |
| Cryobacterium                                                                | 28.4                 | 30.7      | 39.8               | 45.8      | 72.0             | 0.856          | 0.970           |
| Aridibacter unclassified                                                     | 44.0                 | 24.2      | 39.7               | 35.8      | 55.5             | 0.820          | 0.970           |
| Sphingomonadaceae unclassified                                               | 48.6                 | 25.0      | 39.0               | 18.9      | 50.5             | 0.379          | 0.632           |
| Myxococcales unclassified                                                    | 22.3                 | 23.5      | 35.8               | 35.7      | 78.5             | 0.306          | 0.584           |
| Gp6 unclassified                                                             | 21.4                 | 18.3      | 35.6               | 55.8      | 66.0             | 0.938          | 0.988           |
| Oxalobacteraceae unclassified                                                | 25.7                 | 18.6      | 34.4               | 26.6      | 93.5             | 0.196          | 0.560           |
| Mycobacterium                                                                | 8.1                  | 5.0       | 33.8               | 31.4      | 129.0            | <b>0.002</b>   | 0.114           |
| Bacteroidetes unclassified                                                   | 39.9                 | 24.2      | 33.1               | 28.4      | 45.5             | 0.255          | 0.584           |
| Granulicella unclassified                                                    | 0.8                  | 4.6       | 32.9               | 76.1      | 18.0             | 0.142          | 0.455           |
| Clostridium sensu stricto                                                    | 11.6                 | 20.0      | 32.9               | 56.0      | 84.0             | 0.052          | 0.326           |
| Bradyrhizobium                                                               | 16.0                 | 10.1      | 32.8               | 22.1      | 102.5            | 0.079          | 0.370           |
| Acidobacteria Gp1 unclassified                                               | 12.1                 | 46.4      | 31.4               | 63.3      | 46.0             | 0.264          | 0.584           |
| Marmoricola                                                                  | 73.8                 | 41.7      | 30.1               | 27.6      | 7.0              | <b>0.003</b>   | 0.114           |
| Gemmatimonas                                                                 | 43.3                 | 25.1      | 30.0               | 30.6      | 50.0             | 0.365          | 0.632           |
| Noviherbaspirillum                                                           | 57.7                 | 85.2      | 29.9               | 32.7      | 50.5             | 0.379          | 0.632           |
| Burkholderia                                                                 | 1.6                  | 2.3       | 26.2               | 53.7      | 80.5             | <b>0.016</b>   | 0.279           |
| Polaromonas                                                                  | 23.2                 | 12.5      | 24.8               | 21.1      | 71.0             | 0.897          | 0.970           |



|                                              |      |      |      |      |       |              |       |
|----------------------------------------------|------|------|------|------|-------|--------------|-------|
| <b>Novosphingobium</b>                       | 32.6 | 25.5 | 23.7 | 23.3 | 50.5  | 0.379        | 0.632 |
| <b>Spirosoma</b>                             | 45.1 | 28.9 | 23.6 | 25.8 | 33.0  | 0.074        | 0.370 |
| <b>Gp3 unclassified</b>                      | 18.4 | 39.1 | 23.4 | 28.6 | 89.0  | 0.289        | 0.584 |
| <b>Pseudomonas</b>                           | 64.4 | 74.5 | 22.9 | 30.9 | 28.0  | <b>0.041</b> | 0.299 |
| <b>Actinobacteria unclassified</b>           | 22.8 | 12.1 | 22.7 | 16.0 | 57.5  | 0.605        | 0.880 |
| <b>Arenimonas</b>                            | 33.9 | 23.4 | 22.6 | 22.1 | 35.5  | 0.098        | 0.392 |
| <b>Sinobacteraceae unclassified</b>          | 5.6  | 5.9  | 21.9 | 28.6 | 88.0  | 0.118        | 0.411 |
| <b>Planctomycetaceae unclassified</b>        | 16.0 | 28.2 | 20.6 | 19.6 | 91.0  | 0.245        | 0.584 |
| <b>Brevundimonas</b>                         | 15.8 | 12.6 | 20.2 | 23.0 | 72.5  | 0.836        | 0.970 |
| <b>Proteobacteria unclassified</b>           | 18.6 | 13.4 | 20.1 | 17.9 | 67.5  | 1.000        | 1.000 |
| <b>Gaiella</b>                               | 11.9 | 12.3 | 18.3 | 29.2 | 63.0  | 0.887        | 0.970 |
| <b>candidate division WPS.1 unclassified</b> | 6.6  | 6.0  | 18.0 | 17.8 | 105.5 | 0.056        | 0.326 |
| <b>Acidobacteria Gp4 unclassified</b>        | 26.2 | 27.4 | 17.9 | 15.5 | 41.0  | 0.170        | 0.505 |
| <b>Blastocatella unclassified</b>            | 17.1 | 46.0 | 16.8 | 35.2 | 36.0  | 0.103        | 0.392 |
| <b>Duganella</b>                             | 22.7 | 7.5  | 16.7 | 15.7 | 93.0  | 0.065        | 0.345 |
| <b>Terrimonas</b>                            | 13.6 | 6.8  | 16.6 | 19.4 | 90.0  | 0.093        | 0.392 |
| <b>Subdivision3 unclassified</b>             | 4.4  | 5.9  | 15.4 | 18.5 | 88.0  | 0.118        | 0.411 |
| <b>Opitutus</b>                              | 15.9 | 6.4  | 14.9 | 21.0 | 59.0  | 0.706        | 0.933 |
| <b>Cytophagales unclassified</b>             | 16.1 | 12.5 | 14.6 | 20.2 | 46.0  | 0.266        | 0.584 |
| <b>Roseomonas</b>                            | 23.2 | 9.9  | 14.4 | 14.7 | 59.0  | 0.660        | 0.924 |
| <b>Acidobacteria Gp3 unclassified</b>        | 8.1  | 17.3 | 14.1 | 20.5 | 79.0  | 0.293        | 0.584 |
| <b>Dyadobacter</b>                           | 14.2 | 12.0 | 13.7 | 18.6 | 56.0  | 0.842        | 0.970 |
| <b>Cellvibrio</b>                            | 36.9 | 31.5 | 13.6 | 12.7 | 43.2  | 0.023        | 0.279 |
| <b>Acetobacteraceae unclassified</b>         | 14.3 | 18.7 | 13.6 | 20.7 | 68.0  | 0.670        | 0.924 |
| <b>Gp4 unclassified</b>                      | 1.1  | 1.9  | 13.3 | 40.4 | 53.5  | 0.270        | 0.584 |
| <b>Rhizobium</b>                             | 16.0 | 10.9 | 12.2 | 9.7  | 67.0  | 0.712        | 0.933 |
| <b>Rhodopseudomonas</b>                      | 17.3 | 7.7  | 12.1 | 10.4 | 64.5  | 0.877        | 0.970 |
| <b>Nocardoidaceae unclassified</b>           | 14.4 | 11.0 | 12.1 | 10.2 | 53.5  | 0.733        | 0.946 |
| <b>Flavisolibacter</b>                       | 23.3 | 15.0 | 12.0 | 13.7 | 26.0  | 0.057        | 0.326 |
| <b>Conexibacter</b>                          | 24.6 | 40.5 | 11.1 | 15.1 | 49.0  | 0.338        | 0.615 |
| <b>Chryseolinea unclassified</b>             | 7.0  | 6.6  | 11.1 | 12.3 | 54.0  | 0.576        | 0.869 |
| <b>Roseiarcus</b>                            | 0.4  | 1.1  | 10.4 | 23.7 | 43.2  | 0.128        | 0.425 |
| <b>Pseudoxanthomonas</b>                     | 10.2 | 11.5 | 10.0 | 8.6  | 67.0  | 0.979        | 1.000 |
| <b>Cellulomonas</b>                          | 9.9  | 9.4  | 8.6  | 6.9  | 66.0  | 0.938        | 0.988 |
| <b>Phenylobacterium</b>                      | 9.0  | 3.6  | 8.1  | 9.6  | 62.0  | 0.776        | 0.970 |
| <b>Phycococcus</b>                           | 15.3 | 9.5  | 7.6  | 6.4  | 19.0  | 0.012        | 0.279 |
| <b>Actinoplanes</b>                          | 7.5  | 6.3  | 7.2  | 14.6 | 55.5  | 0.875        | 0.970 |
| <b>Gp7 unclassified</b>                      | 8.2  | 15.1 | 7.1  | 19.0 | 45.0  | 0.305        | 0.584 |
| <b>Hyphomicrobium</b>                        | 2.1  | 2.7  | 6.6  | 10.7 | 72.5  | 0.217        | 0.578 |
| <b>Solirubrobacterales unclassified</b>      | 20.0 | 30.2 | 5.2  | 7.1  | 36.0  | 0.103        | 0.392 |
| <b>Solirubrobacter</b>                       | 5.7  | 4.0  | 5.1  | 7.9  | 60.5  | 0.637        | 0.910 |

| <b>C) Intervention vs standard, Day 28<br/>Degrees of Freedom = 23</b> | <b>Mean<br/>standard</b> | <b>sd</b> | <b>Mean<br/>intervention</b> | <b>sd</b> | <b>Statistic</b> | <b>P value</b> | <b>P adjust*</b> |
|------------------------------------------------------------------------|--------------------------|-----------|------------------------------|-----------|------------------|----------------|------------------|
| Observed OTU richness                                                  | 484.0                    | 99.7      | 588.7                        | 128.7     | 2.3              | <b>0.029</b>   | <b>0.04</b>      |
| Chao richness index                                                    | 533.0                    | 134.9     | 670.9                        | 156.9     | 2.4              | <b>0.027</b>   | <b>0.04</b>      |
| Shannon total bacterial community                                      | 5.2                      | 0.4       | 5.6                          | 0.4       | 2.2              | <b>0.040</b>   | <b>0.04</b>      |
| <b>CLASS LEVEL RICHNESS</b>                                            |                          |           |                              |           |                  |                |                  |
| Actinobacteria richness                                                | 72.5                     | 16.2      | 75.8                         | 16.4      | 0.5              | 0.626          | 0.939            |
| Sphingobacteriia richness                                              | 67.4                     | 17.8      | 74.4                         | 17.2      | 1.0              | 0.333          | 0.777            |
| Alphaproteobacteria richness                                           | 80.5                     | 16.3      | 83.5                         | 14.6      | 0.5              | 0.640          | 0.939            |
| Betaproteobacteria richness                                            | 13.0                     | 2.2       | 12.9                         | 1.6       | -0.1             | 0.939          | 0.939            |
| Gammaproteobacteria richness                                           | 19.3                     | 5.9       | 28.3                         | 6.5       | 3.6              | <b>0.002</b>   | <b>0.024</b>     |
| Flavobacteriia richness                                                | 13.0                     | 2.2       | 12.9                         | 1.6       | -0.1             | 0.939          | 0.939            |
| Cytophagia richness                                                    | 39.7                     | 15.5      | 28.6                         | 16.7      | -1.7             | 0.101          | 0.364            |
| Acidobacteria Gp4 richness                                             | 13.0                     | 2.2       | 12.9                         | 1.6       | -0.1             | 0.939          | 0.939            |
| Deltaproteobacteria richness                                           | 9.8                      | 5.1       | 14.1                         | 8.0       | 1.7              | 0.104          | 0.364            |
| Spartobacteria richness                                                | 13.0                     | 2.2       | 12.9                         | 1.6       | -0.1             | 0.939          | 0.939            |
| Bacilli richness                                                       | 1.2                      | 1.9       | 1.6                          | 2.2       | 0.4              | 0.665          | 0.939            |
| Gemmatimonadetes richness                                              | 13.0                     | 2.2       | 12.9                         | 1.6       | -0.1             | 0.939          | 0.939            |
| Acidobacteria Gp1 richness                                             | 3.4                      | 3.5       | 11.3                         | 20.3      | 1.5              | 0.150          | 0.419            |
| Verrucomicrobiae richness                                              | 3.4                      | 2.4       | 6                            | 4.1       | 2.1              | 0.050          | 0.349            |
| <b>CLASS LEVEL DIVERSITY</b>                                           |                          |           |                              |           |                  |                |                  |
| Actinobacteria Shannon                                                 | 3.6                      | 0.2       | 3.6                          | 0.3       | -0.2             | 0.850          | 0.850            |
| Sphingobacteriia Shannon                                               | 3.3                      | 0.3       | 3.6                          | 0.3       | 2.7              | <b>0.016</b>   | 0.074            |
| Alphaproteobacteria Shannon                                            | 3.7                      | 0.2       | 3.8                          | 0.2       | 0.8              | 0.416          | 0.529            |
| Betaproteobacteria Shannon                                             | 1.5                      | 0.1       | 1.6                          | 0.2       | 1.9              | 0.077          | 0.135            |
| Gammaproteobacteria Shannon                                            | 2.3                      | 0.3       | 2.6                          | 0.3       | 2.6              | <b>0.016</b>   | 0.074            |
| Flavobacteriia Shannon                                                 | 1.5                      | 0.1       | 1.6                          | 0.2       | 1.9              | 0.077          | 0.135            |
| Cytophagia Shannon                                                     | 3.1                      | 0.4       | 2.6                          | 0.6       | -2.8             | <b>0.010</b>   | 0.074            |
| Acidobacteria Gp4 Shannon                                              | 1.5                      | 0.1       | 1.6                          | 0.2       | 1.9              | 0.077          | 0.135            |
| Deltaproteobacteria Shannon                                            | 1.8                      | 0.7       | 2.2                          | 0.6       | 1.5              | 0.163          | 0.253            |
| Spartobacteria Shannon                                                 | 1.5                      | 0.1       | 1.6                          | 0.2       | 1.9              | 0.077          | 0.135            |
| Bacilli Shannon                                                        | 0.3                      | 0.6       | 0.4                          | 0.6       | 0.6              | 0.579          | 0.676            |
| Gemmatimonadetes Shannon                                               | 1.5                      | 0.1       | 1.6                          | 0.2       | 1.9              | 0.077          | 0.135            |
| Acidobacteria Gp1 Shannon                                              | 0.8                      | 0.8       | 0.9                          | 1.4       | 0.4              | 0.689          | 0.742            |
| Verrucomicrobiae Shannon                                               | 0.9                      | 0.6       | 1.2                          | 0.7       | 1.0              | 0.316          | 0.442            |

\*Benjamini-Hochberg correction

**Table S4. Comparisons of bacterial richness and Shannon diversity on skin before the intervention period (Baseline A-C) and after the intervention period (Day-28 D-F) among three daycare groups (Intervention, standard and nature-oriented).** Data is shown at total bacterial community, phylum and class levels (mean±standard deviation = sd). Analysis of covariance (ANCOVA) or Kruskal-Wallis test was used depending on Shapiro-Wilk test of normality. Tukey’s HSD post hoc test was used when normality assumption was true and Dunn’s test when normality assumption was violated. The upper part shows (A) **baseline** ANCOVA and Kruskal-Wallis tests and (B) post-hoc tests Tukey HSD and (C) Dunn’s test. The lower part shows (D) **day-28** ANCOVA and Kruskal-Wallis tests and (E) post-hoc tests Tukey HSD and (F) Dunn’s test. **Bold font** indicates significant differences ( $p \leq 0.05$ ).

| A) Analysis of covariance        | Intervention |      | Standard |      | Nature |      | ANCOVA <sup>a</sup> |              | Shapiro-Wilk |              | Kruskal-Wallis |         |
|----------------------------------|--------------|------|----------|------|--------|------|---------------------|--------------|--------------|--------------|----------------|---------|
|                                  | mean         | sd   | mean     | sd   | mean   | sd   | F                   | P value      | W            | P value      | X <sup>2</sup> | P value |
| <b>Baseline</b>                  |              |      |          |      |        |      |                     |              |              |              |                |         |
| <b>Total bacterial community</b> |              |      |          |      |        |      |                     |              |              |              |                |         |
| Observed OTU richness            | 52.8         | 29.3 | 56.6     | 31.7 | 65.9   | 39.6 | 1.1                 | 0.347        | 1.0          | 0.099        | 1.3            | 0.531   |
| Chao richness index              | 60.3         | 42.2 | 61.9     | 40.4 | 78.5   | 55.9 | 1.1                 | 0.333        | 0.9          | <b>0.005</b> | 1.0            | 0.592   |
| shannon                          | 3.3          | 0.7  | 3.6      | 0.6  | 3.6    | 0.7  | 1.2                 | 0.306        | 0.9          | <b>0.001</b> | 1.6            | 0.445   |
| <b>DIVERSITY PHYLUM</b>          |              |      |          |      |        |      |                     |              |              |              |                |         |
| Firmicutes Shannon               | 1.9          | 0.9  | 2.2      | 0.8  | 2.2    | 0.6  | 0.8                 | 0.455        | 1.0          | 0.967        | 1.3            | 0.509   |
| Proteobacteria Shannon           | 2.1          | 0.8  | 2.2      | 0.7  | 2.4    | 0.9  | 0.6                 | 0.540        | 0.9          | <b>0.007</b> | 1.3            | 0.527   |
| Actinobacteria Shannon           | 2.0          | 0.8  | 2.2      | 0.6  | 2.3    | 0.9  | 1.4                 | 0.243        | 1.0          | 0.247        | 1.8            | 0.407   |
| Bacteroidetes Shannon            | 1.2          | 0.9  | 1.2      | 0.9  | 1.4    | 1.0  | 0.3                 | 0.736        | 0.9          | <b>0.000</b> | 0.7            | 0.722   |
| <b>DIVERSITY CLASS</b>           |              |      |          |      |        |      |                     |              |              |              |                |         |
| Bacilli Shannon                  | 1.7          | 0.8  | 1.9      | 0.6  | 1.9    | 0.4  | 1.1                 | 0.333        | 1.0          | 0.756        | 1.5            | 0.472   |
| Gammaproteobacteria Shannon      | 1.5          | 0.7  | 1.4      | 0.7  | 1.3    | 0.6  | 0.6                 | 0.572        | 1.0          | <b>0.011</b> | 1.2            | 0.547   |
| Betaproteobacteria Shannon       | 1.0          | 0.8  | 1.2      | 0.7  | 1.5    | 0.7  | 2.2                 | 0.117        | 1.0          | 0.053        | 3.4            | 0.179   |
| Alphaproteobacteria Shannon      | 0.5          | 0.8  | 0.6      | 0.9  | 1.2    | 1.1  | 3.6                 | <b>0.033</b> | 0.9          | <b>0.000</b> | 5.9            | 0.053   |
| Clostridia Shannon               | 0.4          | 0.8  | 0.6      | 0.9  | 0.4    | 0.8  | 0.4                 | 0.665        | 0.7          | <b>0.000</b> | 1.1            | 0.575   |
| Bacteroidia Shannon              | 0.7          | 0.8  | 0.8      | 0.8  | 0.8    | 0.8  | 0.1                 | 0.881        | 0.9          | <b>0.000</b> | 0.3            | 0.844   |
| Fusobacteriia Shannon            | 0.4          | 0.6  | 0.5      | 0.7  | 0.4    | 0.7  | 0.1                 | 0.899        | 0.7          | <b>0.000</b> | 0.4            | 0.832   |
| Negativicutes Shannon            | 0.3          | 0.5  | 0.4      | 0.5  | 0.2    | 0.4  | 0.5                 | 0.585        | 0.8          | <b>0.000</b> | 0.9            | 0.642   |
| <b>RICHNESS PHYLUM</b>           |              |      |          |      |        |      |                     |              |              |              |                |         |
| Firmicutes richness              | 16.3         | 15.3 | 16.0     | 10.4 | 14.9   | 8.8  | 0.1                 | 0.936        | 0.9          | <b>0.000</b> | 0.3            | 0.852   |
| Proteobacteria richness          | 14.2         | 10.7 | 13.4     | 8.2  | 20.1   | 14.6 | 2.2                 | 0.120        | 0.9          | <b>0.007</b> | 2.4            | 0.295   |
| Actinobacteria richness          | 12.1         | 8.8  | 14.4     | 12.0 | 18.3   | 14.6 | 2.0                 | 0.147        | 0.9          | <b>0.002</b> | 1.3            | 0.512   |
| Bacteroidetes richness           | 5.5          | 4.7  | 5.6      | 4.7  | 7.6    | 6.5  | 1.0                 | 0.365        | 0.9          | <b>0.001</b> | 1.0            | 0.600   |
| <b>CLASS</b>                     |              |      |          |      |        |      |                     |              |              |              |                |         |
| Bacilli richness                 | 11.5         | 9.8  | 11.5     | 7.8  | 10.8   | 5.5  | 0.0                 | 0.958        | 0.9          | <b>0.000</b> | 0.4            | 0.833   |
| Gammaproteobacteria richness     | 6.9          | 4.8  | 5.6      | 3.5  | 6.0    | 3.6  | 0.5                 | 0.599        | 1.0          | 0.115        | 0.2            | 0.897   |
| Betaproteobacteria richness      | 4.5          | 3.7  | 4.5      | 2.4  | 7.1    | 5.2  | 3.1                 | <b>0.050</b> | 0.9          | <b>0.003</b> | 3.8            | 0.149   |
| Alphaproteobacteria richness     | 2.6          | 4.1  | 2.9      | 4.6  | 6.6    | 8.0  | 3.8                 | <b>0.027</b> | 0.9          | <b>0.000</b> | 4.1            | 0.130   |
| Clostridia richness              | 3.5          | 11.1 | 2.7      | 3.6  | 2.8    | 5.9  | 0.1                 | 0.949        | 0.4          | <b>0.000</b> | 1.8            | 0.406   |

|                                  |                                 |     |                |     |                           |     |                |       |                               |              |                |       |
|----------------------------------|---------------------------------|-----|----------------|-----|---------------------------|-----|----------------|-------|-------------------------------|--------------|----------------|-------|
| Bacteroidia richness             | 3.0                             | 3.7 | 3.1            | 3.3 | 3.4                       | 3.1 | 0.1            | 0.941 | 0.9                           | <b>0.000</b> | 0.4            | 0.829 |
| Fusobacteriia richness           | 1.6                             | 2.0 | 2.2            | 3.1 | 1.6                       | 2.0 | 0.4            | 0.661 | 0.8                           | <b>0.000</b> | 0.0            | 0.989 |
| Negativicutes richness           | 1.2                             | 1.6 | 1.5            | 1.7 | 1.2                       | 1.5 | 0.2            | 0.811 | 0.9                           | <b>0.000</b> | 0.5            | 0.764 |
| <b>B) POST-HOC TUKEY'S HSD</b>   |                                 |     |                |     |                           |     |                |       |                               |              |                |       |
|                                  | <b>Intervention vs Standard</b> |     |                |     | <b>Nature vs Standard</b> |     |                |       | <b>Nature vs Intervention</b> |              |                |       |
| <b>Baseline</b>                  | <b>Mean difference</b>          |     | <b>P value</b> |     | <b>Mean difference</b>    |     | <b>P value</b> |       | <b>Mean difference</b>        |              | <b>P value</b> |       |
| <b>Total bacterial community</b> |                                 |     |                |     |                           |     |                |       |                               |              |                |       |
| Observed OTU richness            | -3.843                          |     | 0.922          |     | 9.302                     |     | 0.688          |       | 13.144                        |              | 0.329          |       |
| Chao richness index              | 16.587                          |     | 0.993          |     | 16.587                    |     | 0.542          |       | 18.192                        |              | 0.332          |       |
| Shannon index                    | -0.546                          |     | 0.561          |     | 0.056                     |     | 0.973          |       | 0.284                         |              | 0.350          |       |
| <b>DIVERSITY PHYLUM</b>          |                                 |     |                |     |                           |     |                |       |                               |              |                |       |
| Firmicutes Shannon               | -0.239                          |     | 0.618          |     | 0.013                     |     | 0.999          |       | 0.251                         |              | 0.531          |       |
| Proteobacteria Shannon           | -0.087                          |     | 0.935          |     | 0.162                     |     | 0.832          |       | 0.249                         |              | 0.522          |       |
| Actinobacteria Shannon           | -0.226                          |     | 0.632          |     | 0.139                     |     | 0.871          |       | 0.365                         |              | 0.247          |       |
| Bacteroidetes Shannon            | -0.011                          |     | 0.999          |     | 0.187                     |     | 0.834          |       | 0.199                         |              | 0.737          |       |
| <b>DIVERSITY CLASS</b>           |                                 |     |                |     |                           |     |                |       |                               |              |                |       |
| Bacilli Shannon                  | -0.209                          |     | 0.595          |     | 0.060                     |     | 0.967          |       | 0.269                         |              | 0.365          |       |
| Gammaproteobacteria Shannon      | 0.148                           |     | 0.752          |     | -0.040                    |     | 0.984          |       | -0.188                        |              | 0.582          |       |
| Betaproteobacteria Shannon       | -0.157                          |     | 0.774          |     | 0.282                     |     | 0.524          |       | 0.439                         |              | 0.101          |       |
| Alphaproteobacteria Shannon      | -0.090                          |     | 0.946          |     | 0.589                     |     | 0.164          |       | 0.678                         |              | <b>0.030</b>   |       |
| Clostridia Shannon               | -0.235                          |     | 0.654          |     | -0.217                    |     | 0.751          |       | 0.018                         |              | 0.997          |       |
| Bacteroidia Shannon              | -0.074                          |     | 0.951          |     | 0.036                     |     | 0.991          |       | 0.110                         |              | 0.877          |       |
| Fusobacteriia Shannon            | -0.094                          |     | 0.889          |     | -0.069                    |     | 0.952          |       | 0.025                         |              | 0.990          |       |
| Negativicutes Shannon            | -0.130                          |     | 0.649          |     | -0.164                    |     | 0.584          |       | -0.034                        |              | 0.966          |       |
| <b>RICHNESS PHYLUM</b>           |                                 |     |                |     |                           |     |                |       |                               |              |                |       |
| Firmicutes richness              | 0.314                           |     | 0.997          |     | -1.056                    |     | 0.972          |       | -1.370                        |              | 0.930          |       |
| Proteobacteria richness          | 0.771                           |     | 0.972          |     | 6.683                     |     | 0.200          |       | 5.911                         |              | 0.151          |       |
| Actinobacteria richness          | -2.214                          |     | 0.795          |     | 3.921                     |     | 0.569          |       | 6.135                         |              | 0.132          |       |
| Bacteroidetes richness           | -0.157                          |     | 0.995          |     | 1.913                     |     | 0.559          |       | 2.070                         |              | 0.361          |       |
| <b>RICHNESS CLASS</b>            |                                 |     |                |     |                           |     |                |       |                               |              |                |       |
| Bacilli richness                 | -0.543                          |     | 1.000          |     | -0.722                    |     | 0.969          |       | -0.679                        |              | 0.959          |       |
| Gammaproteobacteria richness     | 1.243                           |     | 0.618          |     | 0.357                     |     | 0.969          |       | -0.886                        |              | 0.747          |       |
| Betaproteobacteria richness      | -0.514                          |     | 1.000          |     | 2.611                     |     | 0.142          |       | 2.625                         |              | 0.054          |       |
| Alphaproteobacteria richness     | -0.329                          |     | 0.978          |     | 3.683                     |     | 0.124          |       | 4.011                         |              | <b>0.027</b>   |       |
| Clostridia richness              | 0.743                           |     | 0.962          |     | 0.063                     |     | 1.000          |       | -0.679                        |              | 0.962          |       |
| Bacteroidia richness             | -0.114                          |     | 0.994          |     | 0.246                     |     | 0.979          |       | 0.360                         |              | 0.933          |       |
| Fusobacteriia richness           | -0.643                          |     | 0.650          |     | -0.603                    |     | 0.742          |       | 0.040                         |              | 0.998          |       |
| Negativicutes richness           | -0.829                          |     | 0.791          |     | -0.278                    |     | 0.876          |       | 0.051                         |              | 0.993          |       |
| <b>C) POST-HOC DUNN'S TEST</b>   |                                 |     |                |     |                           |     |                |       |                               |              |                |       |
|                                  | <b>Intervention vs Standard</b> |     |                |     | <b>Nature vs Standard</b> |     |                |       | <b>Nature vs Intervention</b> |              |                |       |
| <b>Baseline</b>                  | <b>Dunn statistic</b>           |     | <b>P value</b> |     | <b>Dunn statistic</b>     |     | <b>P value</b> |       | <b>Dunn statistic</b>         |              | <b>P value</b> |       |
| <b>Total bacterial community</b> |                                 |     |                |     |                           |     |                |       |                               |              |                |       |
| Observed OTU richness            | 0.425                           |     | 0.671          |     | 0.659                     |     | 0.671          |       | 1.268                         |              | 0.614          |       |
| Chao richness index              | 0.374                           |     | 0.708          |     | 0.629                     |     | 0.708          |       | 1.177                         |              | 0.708          |       |
| Shannon index                    | 0.748                           |     | 0.649          |     | 0.455                     |     | 0.649          |       | 1.371                         |              | 0.511          |       |
| <b>DIVERSITY PHYLUM</b>          |                                 |     |                |     |                           |     |                |       |                               |              |                |       |
| Firmicutes Shannon               | 1.154                           |     | 0.405          |     | 0.125                     |     | 0.900          |       | 1.104                         |              | 0.405          |       |



|                                       |                                 |                |                           |                        |                               |                  |                        |                |                        |                |                        |                |
|---------------------------------------|---------------------------------|----------------|---------------------------|------------------------|-------------------------------|------------------|------------------------|----------------|------------------------|----------------|------------------------|----------------|
| Firmicutes richness                   | 14.8                            | 9.9            | 14.2                      | 8.3                    | 15.9                          | 12.2             | 0.1                    | 0.899          | 0.9                    | <b>0.011</b>   | 0.0                    | 0.989          |
| Proteobacteria richness               | 19.9                            | 15.4           | 9.1                       | 4.6                    | 19.8                          | 13.0             | 3.4                    | <b>0.042</b>   | 0.9                    | <b>0.000</b>   | 9.4                    | <b>0.009</b>   |
| Actinobacteria richness               | 15.6                            | 16.7           | 9.3                       | 4.8                    | 19.4                          | 13.1             | 2.1                    | 0.136          | 0.8                    | <b>0.000</b>   | 3.9                    | 0.142          |
| Bacteroidetes richness                | 6.4                             | 5.7            | 3.5                       | 2.4                    | 7.0                           | 4.8              | 2.1                    | 0.138          | 0.9                    | <b>0.000</b>   | 3.3                    | 0.188          |
| <b>RICHNESS CLASS</b>                 |                                 |                |                           |                        |                               |                  |                        |                |                        |                |                        |                |
| Bacilli richness                      | 12.2                            | 8.4            | 10.8                      | 7.5                    | 10.5                          | 7.8              | 0.4                    | 0.681          | 0.9                    | <b>0.000</b>   | 0.6                    | 0.756          |
| Gammaproteobacteria richness          | 7.8                             | 5.3            | 4.5                       | 2.8                    | 6.9                           | 5.1              | 1.8                    | 0.168          | 0.9                    | <b>0.001</b>   | 4.4                    | 0.111          |
| Betaproteobacteria richness           | 6.6                             | 5.9            | 3.3                       | 2.2                    | 7.0                           | 4.5              | 2.5                    | 0.090          | 0.9                    | <b>0.000</b>   | 8.0                    | <b>0.018</b>   |
| Alphaproteobacteria richness          | 5.0                             | 7.2            | 1.0                       | 2.5                    | 5.4                           | 7.5              | 2.0                    | 0.144          | 0.8                    | <b>0.000</b>   | 7.4                    | <b>0.025</b>   |
| Clostridia richness                   | 1.4                             | 2.7            | 2.4                       | 3.8                    | 3.9                           | 7.4              | 1.5                    | 0.235          | 0.6                    | <b>0.000</b>   | 1.9                    | 0.381          |
| Bacteroidia richness                  | 2.9                             | 2.8            | 2.1                       | 1.9                    | 3.1                           | 3.6              | 0.5                    | 0.615          | 0.9                    | <b>0.000</b>   | 0.5                    | 0.791          |
| Fusobacteriia richness                | 2.5                             | 2.5            | 1.4                       | 1.3                    | 2.0                           | 2.8              | 0.9                    | 0.409          | 0.9                    | <b>0.000</b>   | 1.8                    | 0.401          |
| Negativicutes richness                | 1.1                             | 1.3            | 1.0                       | 1.2                    | 1.3                           | 1.2              | 0.2                    | 0.825          | 0.9                    | <b>0.000</b>   | 0.6                    | 0.755          |
| <b>E) POST-HOC TUKEY's HSD day 28</b> |                                 |                |                           |                        |                               |                  |                        |                |                        |                |                        |                |
|                                       | <b>Intervention vs Standard</b> |                | <b>Nature vs Standard</b> |                        | <b>Nature vs Intervention</b> |                  |                        |                |                        |                |                        |                |
| <b>Total bacterial community</b>      | <b>Mean difference</b>          | <b>P value</b> | <b>P adjust*</b>          | <b>Mean difference</b> | <b>P value</b>                | <b>P adjust*</b> | <b>Mean difference</b> | <b>P value</b> | <b>Mean difference</b> | <b>P value</b> | <b>Mean difference</b> | <b>P value</b> |
| Observed OTU richness                 | 21.541                          | 0.168          |                           | 28.283                 | 0.075                         | 0.113            | 6.742                  |                | 6.742                  |                | 0.794                  |                |
| Chao richness index                   | 39.563                          | 0.224          |                           | 39.563                 | 0.159                         | 0.159            | 6.589                  |                | 6.589                  |                | 0.924                  |                |
| shannon                               | 0.066                           | 0.087          |                           | 0.585                  | <b>0.024</b>                  | 0.072            | 0.153                  |                | 0.153                  |                | 0.665                  |                |
| <b>DIVERSITY PHYLUM</b>               |                                 |                |                           |                        |                               |                  |                        |                |                        |                |                        |                |
| Firmicutes Shannon                    | 0.182                           | 0.736          | 0.736                     | 0.141                  | 0.853                         | 0.853            | -0.041                 |                | -0.041                 |                | 0.980                  |                |
| Proteobacteria Shannon                | 0.645                           | <b>0.027</b>   | 0.108                     | 0.720                  | <b>0.021</b>                  | 0.084            | 0.075                  |                | 0.075                  |                | 0.934                  |                |
| Actinobacteria Shannon                | 0.228                           | 0.724          | 0.736                     | 0.599                  | 0.157                         | 0.209            | 0.371                  |                | 0.371                  |                | 0.342                  |                |
| Bacteroidetes Shannon                 | 0.379                           | 0.357          | 0.714                     | 0.555                  | 0.154                         | 0.209            | 0.176                  |                | 0.176                  |                | 0.748                  |                |
| <b>DIVERSITY CLASS</b>                |                                 |                |                           |                        |                               |                  |                        |                |                        |                |                        |                |
| Bacilli Shannon                       | 0.282                           | 0.410          |                           | 0.024                  | 0.994                         |                  | -0.257                 |                | -0.257                 |                | 0.386                  |                |
| Gammaproteobacteria Shannon           | 0.551                           | 0.053          |                           | 0.369                  | 0.309                         |                  | -0.181                 |                | -0.181                 |                | 0.651                  |                |
| Betaproteobacteria Shannon            | 0.400                           | 0.245          |                           | 0.617                  | 0.061                         |                  | 0.217                  |                | 0.217                  |                | 0.582                  |                |
| Alphaproteobacteria Shannon           | 0.731                           | 0.064          |                           | 0.792                  | 0.063                         |                  | 0.060                  |                | 0.060                  |                | 0.975                  |                |
| Clostridia Shannon                    | -0.218                          | 0.681          |                           | 0.123                  | 0.900                         |                  | 0.341                  |                | 0.341                  |                | 0.307                  |                |
| Bacteroidia Shannon                   | 0.120                           | 0.890          |                           | 0.102                  | 0.929                         |                  | -0.017                 |                | -0.017                 |                | 0.997                  |                |
| Fusobacteriia Shannon                 | 0.161                           | 0.716          |                           | 0.034                  | 0.987                         |                  | -0.127                 |                | -0.127                 |                | 0.766                  |                |
| Negativicutes Shannon                 | -0.032                          | 0.970          |                           | 0.069                  | 0.890                         |                  | 0.101                  |                | 0.101                  |                | 0.689                  |                |
| <b>RICHNESS PHYLUM</b>                |                                 |                |                           |                        |                               |                  |                        |                |                        |                |                        |                |
| Firmicutes richness                   | 0.528                           | 0.987          | 0.987                     | 1.664                  | 0.897                         |                  | 1.136                  |                | 1.136                  |                | 0.927                  |                |
| Proteobacteria richness               | 10.785                          | <b>0.038</b>   | 0.152                     | 10.713                 | 0.060                         |                  | -0.073                 |                | -0.073                 |                | 1.000                  |                |
| Actinobacteria richness               | 6.244                           | 0.363          | 0.484                     | 10.061                 | 0.110                         |                  | 3.817                  |                | 3.817                  |                | 0.613                  |                |
| Bacteroidetes richness                | 2.841                           | 0.199          | 0.398                     | 3.462                  | 0.130                         |                  | 0.621                  |                | 0.621                  |                | 0.903                  |                |
| <b>RICHNESS CLASS</b>                 |                                 |                |                           |                        |                               |                  |                        |                |                        |                |                        |                |
| Bacilli richness                      | 1.403                           | 0.859          |                           | -0.296                 | 0.994                         |                  | -1.699                 |                | -1.699                 |                | 0.752                  |                |
| Gammaproteobacteria richness          | 3.220                           | 0.117          |                           | 2.409                  | 0.348                         |                  | -0.811                 |                | -0.811                 |                | 0.834                  |                |
| Betaproteobacteria richness           | 3.313                           | 0.116          |                           | 3.692                  | 0.100                         |                  | 0.379                  |                | 0.379                  |                | 0.963                  |                |
| Alphaproteobacteria richness          | 4.034                           | 0.156          |                           | 4.421                  | 0.147                         |                  | 0.387                  |                | 0.387                  |                | 0.978                  |                |

|                                       |                                 |                |                  |                           |                |                  |                               |                |
|---------------------------------------|---------------------------------|----------------|------------------|---------------------------|----------------|------------------|-------------------------------|----------------|
| Clostridia richness                   | -0.971                          | 0.825          | 1.563            | 0.652                     | 2.534          | 0.196            |                               |                |
| Bacteroidia richness                  | 0.854                           | 0.667          | 0.976            | 0.635                     | 0.122          | 0.989            |                               |                |
| Fusobacteriia richness                | 1.098                           | 0.378          | 0.615            | 0.766                     | -0.483         | 0.783            |                               |                |
| Negativicutes richness                | 0.069                           | 0.985          | 0.263            | 0.832                     | 0.194          | 0.861            |                               |                |
| <b>F) POST HOC DUNN'S TEST Day 28</b> | <b>Intervention vs Standard</b> |                |                  | <b>Nature vs Standard</b> |                |                  | <b>Nature vs Intervention</b> |                |
| <b>Total bacterial community</b>      | <b>Dunn statistic</b>           | <b>P value</b> | <b>P adjust*</b> | <b>Dunn statistic</b>     | <b>P value</b> | <b>P adjust*</b> | <b>Dunn statistic</b>         | <b>P value</b> |
| Observed OTU richness                 | 1.608                           | 0.162          |                  | 2.112                     | 0.104          |                  | 0.758                         | 0.449          |
| Chao richness index                   | 1.505                           | 0.199          |                  | 2.064                     | 0.117          |                  | 0.816                         | 0.415          |
| shannon                               | 1.664                           | 0.144          |                  | 2.321                     | 0.061          |                  | 0.949                         | 0.342          |
| <b>DIVERSITY PHYLUM</b>               |                                 |                |                  |                           |                |                  |                               |                |
| Firmicutes Shannon                    | 0.815                           | 0.415          | 0.415            | 0.857                     | 0.392          | 0.392            | 0.123                         | 0.902          |
| Proteobacteria Shannon                | 2.579                           | <b>0.010</b>   | <b>0.040</b>     | 2.920                     | <b>0.004</b>   | <b>0.014</b>     | 0.644                         | 0.520          |
| Actinobacteria Shannon                | 0.914                           | 0.361          | 0.415            | 2.069                     | <b>0.039</b>   | 0.077            | 1.489                         | 0.136          |
| Bacteroidetes Shannon                 | 1.173                           | 0.241          | 0.415            | 1.632                     | 0.103          | 0.137            | 0.664                         | 0.507          |
| <b>DIVERSITY CLASS</b>                |                                 |                |                  |                           |                |                  |                               |                |
| Bacilli Shannon                       | 1.236                           | 0.216          | 0.413            | 0.337                     | 0.736          | 0.954            | 0.987                         | 0.324          |
| Gammaproteobacteria Shannon           | 2.530                           | <b>0.005</b>   | <b>0.041</b>     | 1.465                     | 0.142          | 0.378            | 1.075                         | 0.169          |
| Betaproteobacteria Shannon            | 1.652                           | 0.099          | 0.263            | 2.927                     | <b>0.003</b>   | <b>0.027</b>     | 1.701                         | 0.089          |
| Alphaproteobacteria Shannon           | 2.379                           | <b>0.017</b>   | 0.069            | 2.293                     | 0.022          | 0.087            | 0.106                         | 0.915          |
| Clostridia Shannon                    | 1.130                           | 0.258          | 0.413            | 0.187                     | 0.852          | 0.954            | 1.507                         | 0.132          |
| Bacteroidia Shannon                   | 0.433                           | 0.665          | 0.665            | 0.246                     | 0.806          | 0.954            | 0.190                         | 0.849          |
| Fusobacteriia Shannon                 | 0.637                           | 0.524          | 0.665            | 0.057                     | 0.954          | 0.954            | 0.790                         | 0.429          |
| Negativicutes Shannon                 | 0.439                           | 0.660          | 0.665            | 0.528                     | 0.598          | 0.954            | 1.141                         | 0.254          |
| <b>RICHNESS PHYLUM</b>                |                                 |                |                  |                           |                |                  |                               |                |
| Firmicutes richness                   | 0.146                           | 0.884          | 0.884            | 0.064                     | 0.949          | 0.949            | 0.088                         | 0.930          |
| Proteobacteria richness               | 2.717                           | <b>0.007</b>   | <b>0.026</b>     | 2.829                     | <b>0.005</b>   | <b>0.019</b>     | 0.378                         | 0.705          |
| Actinobacteria richness               | 0.965                           | 0.334          | 0.446            | 1.941                     | 0.052          | 0.094            | 1.276                         | 0.202          |
| Bacteroidetes richness                | 1.359                           | 0.174          | 0.349            | 1.808                     | 0.071          | 0.094            | 0.669                         | 0.504          |
| <b>RICHNESS CLASS</b>                 |                                 |                |                  |                           |                |                  |                               |                |
| Bacilli richness                      | 0.412                           | 0.680          | 0.777            | 0.216                     | 0.829          | 0.864            | 0.729                         | 0.466          |
| Gammaproteobacteria richness          | 2.096                           | <b>0.036</b>   | 0.103            | 1.300                     | 0.194          | 0.516            | 0.785                         | 0.432          |
| Betaproteobacteria richness           | 2.068                           | <b>0.039</b>   | 0.103            | 2.802                     | <b>0.005</b>   | <b>0.041</b>     | 1.080                         | 0.280          |
| Alphaproteobacteria richness          | 2.607                           | <b>0.009</b>   | 0.073            | 2.262                     | 0.024          | 0.095            | 0.189                         | 0.850          |
| Clostridia richness                   | 0.486                           | 0.627          | 0.777            | 0.688                     | 0.491          | 0.849            | 1.390                         | 0.165          |

<sup>a</sup> Degree of Freedom between groups = 2 and within groups = 58

\*Benjamini-Hochberg correction

**Table S5.** Before-after comparisons (Wilcoxon-Signed Rank test) for bacterial diversity on skin at total bacterial community, and phylum and class levels among children in **(A)** intervention (n = 29), **(B)** standard (n = 14) and **(C)** nature-oriented daycare centers (n = 19) (Mean  $\pm$  Standard Deviation = sd). **Bold** font indicates significant differences ( $p \leq 0.05$ ).

| <b>A) Intervention</b>      | <b>Mean before</b> | <b>sd before</b> | <b>Mean after</b> | <b>sd after</b> | <b>Statistic</b> | <b>P value</b> | <b>P adjust*</b> |
|-----------------------------|--------------------|------------------|-------------------|-----------------|------------------|----------------|------------------|
| Observed OTU richness       | 53.3               | 29.1             | <b>63.5</b>       | 41.0            | 239              | 0.110          |                  |
| Chao richness index         | 59.9               | 40.1             | <b>77.5</b>       | 75.8            | 257              | 0.105          |                  |
| Shannon                     | 3.3                | 0.8              | 3.6               | 0.6             | 268              | 0.059          |                  |
| <b>DIVERSITY PHYLUM</b>     |                    |                  |                   |                 |                  |                |                  |
| Firmicutes Shannon          | 1.9                | 0.8              | 2.1               | 0.6             | 231              | 0.319          |                  |
| Proteobacteria Shannon      | 2.2                | 0.8              | 2.4               | 0.7             | 233              | 0.296          |                  |
| Actinobacteria Shannon      | 2.0                | 0.9              | 2.0               | 1.0             | 187              | 0.780          |                  |
| Bacteroidetes Shannon       | 1.1                | 0.9              | 1.4               | 0.9             | 198              | 0.346          |                  |
| Fusobacteria Shannon        | 0.5                | 0.6              | 0.6               | 0.7             | 102              | 0.486          |                  |
|                             |                    |                  |                   |                 |                  |                |                  |
| <b>DIVERSITY CLASS</b>      |                    |                  |                   |                 |                  |                |                  |
| Bacilli Shannon             | 1.8                | 0.8              | 1.9               | 0.5             | 225              | 0.394          | 0.879            |
| Gammaproteobacteria Shannon | 1.6                | 0.6              | 1.6               | 0.7             | 182              | 0.879          | 0.879            |
| Betaproteobacteria Shannon  | 1.2                | 0.7              | 1.3               | 0.8             | 208              | 0.657          | 0.879            |
| Alphaproteobacteria Shannon | 0.6                | 0.9              | 1.0               | 1.0             | 127              | <b>0.018</b>   | 0.144            |
| Clostridia Shannon          | 0.3                | 0.4              | 0.3               | 0.6             | 42               | 0.844          | 0.879            |
| Bacteroidia Shannon         | 0.6                | 0.7              | 0.7               | 0.8             | 97               | 0.632          | 0.879            |
| Fusobacteriia Shannon       | 0.5                | 0.6              | 0.6               | 0.7             | 102              | 0.486          | 0.879            |
| Negativicutes Shannon       | 0.2                | 0.4              | 0.2               | 0.4             | 37               | 0.756          | 0.879            |
| <b>B) Standard</b>          | <b>Mean before</b> | <b>sd before</b> | <b>Mean after</b> | <b>sd after</b> | <b>Statistic</b> | <b>P value</b> |                  |
| Observed OTU richness       | 58.9               | 37.3             | 44.3              | 14.7            | 28               | 0.235          |                  |
| Chao richness index         | 69.2               | 52.8             | 47.8              | 19.1            | 28               | 0.235          |                  |
| Shannon                     | 3.5                | 0.8              | 3.2               | 0.5             | 36               | 0.529          |                  |
| <b>DIVERSITY PHYLUM</b>     |                    |                  |                   |                 |                  |                |                  |
| Firmicutes Shannon          | 2.1                | 1.1              | 2.1               | 0.4             | 40               | 0.727          |                  |
| Proteobacteria Shannon      | 2.1                | 0.8              | 2.0               | 0.6             | 48               | 0.889          |                  |
| Actinobacteria Shannon      | 2.0                | 0.9              | 1.6               | 0.8             | 27               | 0.367          |                  |
| Bacteroidetes Shannon       | 1.2                | 0.9              | 1.1               | 0.7             | 30               | 0.505          |                  |
| Fusobacteria Shannon        | 0.5                | 0.7              | 0.6               | 0.6             | 25               | 0.813          |                  |
|                             |                    |                  |                   |                 |                  |                |                  |
| <b>DIVERSITY CLASS</b>      |                    |                  |                   |                 |                  |                |                  |
| Bacilli Shannon             | 1.6                | 0.9              | 1.8               | 0.6             | 50               | 0.780          |                  |
| Gammaproteobacteria Shannon | 1.2                | 0.6              | 1.3               | 0.6             | 57               | 0.442          |                  |
| Betaproteobacteria Shannon  | 1.2                | 0.7              | 1.2               | 0.5             | 48               | 0.889          |                  |
| Alphaproteobacteria Shannon | 0.4                | 0.9              | 0.1               | 0.3             | 3                | 0.281          |                  |
| Clostridia Shannon          | 0.8                | 1.2              | 0.4               | 0.7             | 12               | 0.441          |                  |
| Bacteroidia Shannon         | 0.7                | 0.9              | 0.7               | 0.7             | 24               | 0.906          |                  |



|                             |                    |                  |                   |                 |                  |                |
|-----------------------------|--------------------|------------------|-------------------|-----------------|------------------|----------------|
| Fusobacteriia Shannon       | 0.5                | 0.7              | 0.6               | 0.6             | 25               | 0.813          |
| Negativicutes Shannon       | 0.3                | 0.4              | 0.2               | 0.4             | 12               | 0.800          |
| <b>C) Nature-oriented</b>   | <b>Mean before</b> | <b>sd before</b> | <b>Mean after</b> | <b>sd after</b> | <b>Statistic</b> | <b>P value</b> |
| Observed OTU richness       | 69.5               | 41.1             | 73.7              | 39.2            | 64               | 0.864          |
| Chao richness index         | 84.1               | 58.5             | 88.2              | 56.1            | 62               | 0.932          |
| Shannon                     | 3.7                | 0.8              | 3.8               | 0.6             | 69               | 0.629          |
| <b>DIVERSITY PHYLUM</b>     |                    |                  |                   |                 |                  |                |
| Firmicutes Shannon          | 2.2                | 0.6              | 2.2               | 0.9             | 57               | 0.887          |
| Proteobacteria Shannon      | 2.4                | 1.0              | 2.6               | 0.8             | 68               | 0.670          |
| Actinobacteria Shannon      | 2.3                | 0.9              | 2.6               | 0.8             | 74               | 0.443          |
| Bacteroidetes Shannon       | 1.5                | 1.0              | 1.6               | 0.8             | 71               | 0.551          |
| Fusobacteria Shannon        | 0.4                | 0.7              | 0.5               | 0.5             | 30               | 0.878          |
| <b>DIVERSITY CLASS</b>      |                    |                  |                   |                 |                  |                |
| Bacilli Shannon             | 1.9                | 0.4              | 1.7               | 0.8             | 49               | 0.551          |
| Gammaproteobacteria Shannon | 1.4                | 0.6              | 1.6               | 0.7             | 73               | 0.478          |
| Betaproteobacteria Shannon  | 1.5                | 0.7              | 1.5               | 0.7             | 55               | 0.900          |
| Alphaproteobacteria Shannon | 1.3                | 1.1              | 1.1               | 1.1             | 34               | 0.724          |
| Clostridia Shannon          | 0.5                | 0.8              | 0.7               | 1.1             | 34               | 0.541          |
| Bacteroidia Shannon         | 0.8                | 0.7              | 0.8               | 0.9             | 29               | 0.756          |
| Fusobacteriia Shannon       | 0.4                | 0.7              | 0.5               | 0.5             | 30               | 0.878          |
| Negativicutes Shannon       | 0.3                | 0.5              | 0.3               | 0.4             | 28               | 0.594          |

**Table S6.** Gut bacterial before-after comparisons (Paired t-test) among A) intervention, B) nature-oriented and C) standard daycare children. Relative abundances are shown at order level and diversities at family level [Mean ± Standard Deviation (sd)].

| <b>A) Intervention</b>          | <b>Mean before</b> | <b>sd before</b> | <b>Mean after</b> | <b>sd after</b> | <b>Statistic</b> | <b>P value</b> | <b>P adjust*</b> |
|---------------------------------|--------------------|------------------|-------------------|-----------------|------------------|----------------|------------------|
| <b>ORDER RELATIVE ABUNDANCE</b> |                    |                  |                   |                 |                  |                |                  |
| Bacteroidales                   | 1165.3             | 689.9            | 1490.9            | 503.2           | 2.2              | 0.039          | 0.256            |
| Bifidobacteriales               | 181.1              | 98.1             | 190.2             | 167.8           | 0.2              | 0.820          | 0.888            |
| Burkholderiales                 | 17.5               | 26.7             | 17.0              | 15.1            | -0.1             | 0.941          | 0.941            |
| Clostridiales                   | 2014.3             | 490.7            | 1717.7            | 401.1           | -3.3             | <b>0.003</b>   | <b>0.043</b>     |
| Coriobacteriales                | 45.1               | 35.3             | 63.1              | 66.2            | 1.6              | 0.127          | 0.383            |
| Desulfovibrionales              | 1.3                | 3.5              | 2.8               | 4.7             | 1.2              | 0.236          | 0.383            |
| Enterobacteriales               | 14.7               | 25.9             | 10.1              | 18.2            | -0.9             | 0.404          | 0.478            |
| Erysipelotrichales              | 11.3               | 12.5             | 23.0              | 29.0            | 1.8              | 0.083          | 0.358            |
| Firmicutes_unclassified         | 41.1               | 75.2             | 22.8              | 36.2            | -1.3             | 0.201          | 0.383            |
| Lactobacillales                 | 27.9               | 40.7             | 41.8              | 87.6            | 0.9              | 0.404          | 0.478            |
| Pasteurellales                  | 73.5               | 274.4            | 9.7               | 16.6            | -1.1             | 0.277          | 0.401            |
| Selenomonadales                 | 94.1               | 99.5             | 143.8             | 166.5           | 1.3              | 0.225          | 0.383            |
| Verrucomicrobiales              | 136.7              | 244.1            | 101.8             | 170.4           | -1.3             | 0.219          | 0.383            |
| <b>FAMILY DIVERSITIES</b>       |                    |                  |                   |                 |                  |                |                  |

|                                                       |                        |                  |                   |                 |                  |                |                  |
|-------------------------------------------------------|------------------------|------------------|-------------------|-----------------|------------------|----------------|------------------|
| Bacteroidaceae Shannon                                | 1.4                    | 0.5              | 1.5               | 0.5             | 0.4              | 0.726          | 0.726            |
| Bifidobacteriaceae Shannon                            | 0.6                    | 0.4              | 0.6               | 0.3             | 0.8              | 0.456          | 0.570            |
| Lachnospiraceae Shannon                               | 2.3                    | 0.3              | 2.4               | 0.3             | 1.7              | 0.096          | 0.222            |
| Prevotellaceae Shannon                                | 0.2                    | 0.4              | 0.1               | 0.3             | -1.6             | 0.133          | 0.222            |
| Ruminococcaceae Shannon                               | 1.6                    | 0.5              | 1.8               | 0.4             | 2.8              | <b>0.010</b>   | <b>0.050</b>     |
| <b>B) Nature-oriented<br/>Degrees of Freedom = 19</b> | <b>Mean<br/>before</b> | <b>sd before</b> | <b>Mean after</b> | <b>sd after</b> | <b>Statistic</b> | <b>P value</b> | <b>P adjust*</b> |
| <b>ORDER RELATIVE ABUNDANCE</b>                       |                        |                  |                   |                 |                  |                |                  |
| Bacteroidales                                         | 1487.3                 | 629.8            | 1764.3            | 840.9           | 1.6              | 0.133          |                  |
| Bifidobacteriales                                     | 210.5                  | 191.8            | 147.5             | 120.6           | -2.1             | 0.051          |                  |
| Burkholderiales                                       | 12.3                   | 20.6             | 14.9              | 17.7            | 0.5              | 0.616          |                  |
| Clostridiales                                         | 1910.3                 | 515.2            | 1664.2            | 659.9           | -1.5             | 0.147          |                  |
| Coriobacteriales                                      | 42.7                   | 37.8             | 37.6              | 39.0            | -0.8             | 0.432          |                  |
| Desulfovibrionales                                    | 1.5                    | 3.9              | 1.7               | 3.9             | 0.2              | 0.819          |                  |
| Enterobacteriales                                     | 4.4                    | 9.3              | 15.7              | 47.2            | 1.0              | 0.312          |                  |
| Erysipelotrichales                                    | 17.3                   | 27.3             | 9.5               | 9.7             | -1.7             | 0.109          |                  |
| Firmicutes_unclassified                               | 29.3                   | 53.4             | 39.4              | 68.6            | 1.4              | 0.177          |                  |
| Lactobacillales                                       | 29.1                   | 44.7             | 18.9              | 36.4            | -0.7             | 0.469          |                  |
| Pasteurellales                                        | 17.2                   | 32.8             | 8.6               | 12.8            | -1.1             | 0.300          |                  |
| Selenomonadales                                       | 42.8                   | 73.5             | 65.1              | 109.0           | 1.0              | 0.347          |                  |
| Verrucomicrobiales                                    | 31.9                   | 60.9             | 39.4              | 79.8            | 0.5              | 0.602          |                  |
| <b>FAMILY DIVERSITY</b>                               |                        |                  |                   |                 |                  |                |                  |
| Bacteroidaceae Shannon                                | 1.5                    | 0.3              | 1.5               | 0.4             | 0.0              | 0.990          |                  |
| Bifidobacteriaceae Shannon                            | 0.6                    | 0.3              | 0.5               | 0.4             | -1.8             | 0.088          |                  |
| Lachnospiraceae Shannon                               | 2.5                    | 0.4              | 2.5               | 0.3             | 1.2              | 0.244          |                  |
| Prevotellaceae Shannon                                | 0.2                    | 0.4              | 0.3               | 0.4             | 1.2              | 0.254          |                  |
| Ruminococcaceae Shannon                               | 1.7                    | 0.4              | 1.8               | 0.3             | 1.1              | 0.292          |                  |
| <b>C) Standard<br/>Degrees of Freedom = 12</b>        | <b>Mean<br/>before</b> | <b>sd before</b> | <b>Mean after</b> | <b>sd after</b> | <b>Statistic</b> | <b>P value</b> | <b>P adjust*</b> |
| <b>ORDER RELATIVE ABUNDANCE</b>                       |                        |                  |                   |                 |                  |                |                  |
| Bacteroidales                                         | 1060.2                 | 791.1            | 1489.3            | 630.1           | 2.0              | 0.069          | 0.179            |
| Bifidobacteriales                                     | 367.3                  | 233.3            | 213.6             | 182.0           | -2.1             | 0.059          | 0.179            |
| Burkholderiales                                       | 1.4                    | 2.6              | 13.6              | 11.8            | 3.4              | <b>0.007</b>   | 0.091            |
| Clostridiales                                         | 2123.5                 | 642.3            | 1907.5            | 623.0           | -1.2             | 0.260          | 0.483            |
| Coriobacteriales                                      | 77.3                   | 71.5             | 42.5              | 46.5            | -2.6             | <b>0.029</b>   | 0.179            |
| Desulfovibrionales                                    | 1.3                    | 4.2              | 2.1               | 3.3             | 0.7              | 0.502          | 0.670            |
| Enterobacteriales                                     | 11.3                   | 15.2             | 6.9               | 20.0            | -0.5             | 0.617          | 0.670            |
| Erysipelotrichales                                    | 24.5                   | 25.9             | 12.6              | 12.3            | -1.7             | 0.113          | 0.245            |
| Firmicutes_unclassified                               | 35.6                   | 34.2             | 44.7              | 78.4            | 0.5              | 0.618          | 0.670            |
| Lactobacillales                                       | 31.4                   | 48.3             | 4.6               | 8.3             | -2.1             | 0.060          | 0.179            |
| Pasteurellales                                        | 2.5                    | 5.2              | 3.1               | 4.4             | 0.4              | 0.718          | 0.718            |
| Selenomonadales                                       | 39.0                   | 65.1             | 55.1              | 115.5           | 0.6              | 0.580          | 0.670            |
| Verrucomicrobiales                                    | 53.6                   | 120.9            | 30.4              | 74.1            | -0.5             | 0.614          | 0.670            |
| <b>FAMILY DIVERSITY</b>                               |                        |                  |                   |                 |                  |                |                  |
| Bacteroidaceae Shannon                                | 1.3                    | 0.3              | 1.5               | 0.4             | 2.3              | <b>0.044</b>   | 0.219            |
| Bifidobacteriaceae Shannon                            | 0.5                    | 0.3              | 0.5               | 0.3             | 0.1              | 0.902          | 0.902            |
| Lachnospiraceae Shannon                               | 2.5                    | 0.2              | 2.4               | 0.4             | -0.5             | 0.634          | 0.793            |

|                         |     |     |     |     |      |       |       |
|-------------------------|-----|-----|-----|-----|------|-------|-------|
| Prevotellaceae Shannon  | 0.0 | 0.1 | 0.1 | 0.2 | 1.3  | 0.227 | 0.567 |
| Ruminococcaceae Shannon | 1.9 | 0.4 | 1.8 | 0.3 | -0.6 | 0.560 | 0.793 |

\*Benjamini-Hochberg correction

**Table S7. Correlations between diversity changes on skin microbiota and plasma cytokine concentrations.**

(A) Increase in skin Gammaproteobacterial Alpha diversity during the 28-day intervention period was associated with rise in plasma TGF- $\beta$ 1 concentration when all children (n = 26) were analyzed with linear mixed model. Among the intervention daycare center children (n = 12), (B) this diversity increase was also associated with a decrease in plasma IL-17A levels and (C) increase in total Treg cell levels. (D) Among the nature-oriented daycare center children (n = 10), the high Gammaproteobacterial diversity was associated with an increase in IL-10 expression, while Proteobacterial diversity was associated with a decrease in IL-10 expression. (E) Among the standard daycare center children (n = 6), the Gammaproteobacterial diversity change was mostly negative, and it was associated with TGF- $\beta$ 1 plasma concentration. Thus, the change in TGF- $\beta$ 1 plasma concentration was mostly negative. (F) Linear mixed-effect model showed that among children in nature-oriented daycare centers (n = 14), the higher abundance of *Faecalibacterium prausnitzii* (Otu000007) was associated with lower plasma levels of IL-17A and Otu000008 (unknown *Faecalibacterium*) with higher plasma levels of IL-17A. (G) The latter association was observed also within standard daycare children (n = 8). (H) Linear mixed-effect model showed that among nature-oriented daycare center children (n = 10), the decrease in IL-17A during the trial was associated with the decrease in the relative abundance of *Dorea* and *Romboutsia*, and increase in *Anaerostipes*.

| <b>A) All children:<br/>TGF-<math>\beta</math>1</b> | <b>Estimate</b> | <b>Std. Error</b> | <b>t value</b> | <b>P value</b> | <b>P adjusted*</b> |
|-----------------------------------------------------|-----------------|-------------------|----------------|----------------|--------------------|
| <b>Gammaproteobacteria</b>                          | 2.601           | 0.904             | 2.877          | <b>0.004</b>   | <b>0.012</b>       |
| <b>B) Intervention<br/>children: IL-17A</b>         | <b>Estimate</b> | <b>Std. Error</b> | <b>t value</b> | <b>P value</b> | <b>P adjusted*</b> |
| <b>Gammaproteobacteria</b>                          | -0.885          | 0.283             | -3.132         | <b>0.002</b>   | <b>0.003</b>       |
| <b>C) Treg cells</b>                                | <b>Estimate</b> | <b>Std. Error</b> | <b>t value</b> | <b>P value</b> |                    |
| <b>Intervention:<br/>Gammaproteobacteria</b>        | 1.238           | 0.513             | 2.413          | <b>0.016</b>   |                    |
| <b>Standard:<br/>Gammaproteobacteria</b>            | -0.281          | 0.300             | -0.936         | 0.349          |                    |

| <b>D) Nature-oriented children: IL-10</b>  |                 |                   |                |                              |                              |
|--------------------------------------------|-----------------|-------------------|----------------|------------------------------|------------------------------|
|                                            | <b>Estimate</b> | <b>Std. Error</b> | <b>t value</b> | <b>P value</b>               | <b>P adjusted*</b>           |
| <b>Gammaproteobacteria</b>                 | 3.539           | 0.715             | 4.947          | <b>7.5 x 10<sup>-7</sup></b> | <b>2.3 x 10<sup>-6</sup></b> |
| <b>Proteobacteria</b>                      | -2.278          | 0.644             | -3.536         | <b>0.0004</b>                | <b>0.0006</b>                |
| <b>E) Standard children: TGF-β1</b>        |                 |                   |                |                              |                              |
|                                            | <b>Estimate</b> | <b>Std. Error</b> | <b>t value</b> | <b>P value</b>               | <b>P adjusted*</b>           |
| <b>Gammaproteobacteria</b>                 | 4.388           | 1.598             | 2.745          | <b>0.006</b>                 | <b>0.012</b>                 |
| <b>F) Nature-oriented children</b>         |                 |                   |                |                              |                              |
|                                            | <b>Estimate</b> | <b>Std. Error</b> | <b>t value</b> | <b>P value</b>               | <b>P adjusted*</b>           |
| <b>Otu000007</b>                           | -0.023          | 0.006             | -3.885         | <b>0.000</b>                 | <b>0.004</b>                 |
| <b>Otu000008</b>                           | 0.013           | 0.004             | 3.470          | <b>0.001</b>                 | <b>0.009</b>                 |
| <b>G) Standard children</b>                |                 |                   |                |                              |                              |
|                                            | <b>Estimate</b> | <b>Std. Error</b> | <b>t value</b> | <b>P value</b>               | <b>P adjusted*</b>           |
| <b>Otu000008</b>                           | 0.033           | 0.012             | 3.067          | <b>0.002</b>                 | <b>0.038</b>                 |
| <b>H) Nature-oriented children: IL-17A</b> |                 |                   |                |                              |                              |
|                                            | <b>Estimate</b> | <b>Std. Error</b> | <b>t value</b> | <b>P value</b>               | <b>P adjusted*</b>           |
| <b>Dorea</b>                               | 0.033           | 0.011             | 2.953          | <b>0.003</b>                 | <b>0.027</b>                 |
| <b>Romboutsia</b>                          | 0.0381          | 0.008             | 4.794          | <b>1.6 x 10<sup>-6</sup></b> | <b>5.7 x 10<sup>-5</sup></b> |
| <b>Anaerostipes</b>                        | -0.013          | 0.004             | -3.324         | <b>0.0009</b>                | <b>0.010</b>                 |

\*Benjamini-Hochberg correction

**Table S8. Correlation between stool *Faecalibacterium* community composition and plasma cytokine levels.**

Community composition of *Faecalibacterium* was associated with the IL-17A concentration in the plasma (n = 55) after but not before the 28-day intervention. No other associations between the measured plasma cytokines and *Faecalibacterium* community composition were found. Non-metric multidimensional scaling (NMDS) with Bray-Curtis metric was used to score the OTUs onto an ordination (NMDS coordinates 1 and 2) and correlation with corresponding cytokine expression levels was assessed using function *envfit* in *vegan* package in R computing environment.

| <b>Before</b> | <b>NMDS 1</b> | <b>NMDS 2</b> | <b>r<sup>2</sup></b> | <b>P-value</b> |                  |
|---------------|---------------|---------------|----------------------|----------------|------------------|
| <b>IL-10</b>  | 0.292         | 0.956         | 0.011                | 0.794          |                  |
| <b>IL-17A</b> | -0.517        | 0.856         | 0.076                | 0.179          |                  |
| <b>TGF-β1</b> | -0.302        | 0.953         | 0.045                | 0.362          |                  |
| <b>After</b>  | <b>NMDS 1</b> | <b>NMDS 2</b> | <b>r<sup>2</sup></b> | <b>P-value</b> | <b>P adjust*</b> |
| <b>IL-10</b>  | -0.950        | -0.311        | 0.048                | 0.354          | 0.531            |
| <b>IL-17A</b> | -0.884        | -0.468        | 0.214                | <b>0.015</b>   | <b>0.045</b>     |
| <b>TGF-β1</b> | 0.918         | 0.397         | 0.025                | 0.585          | 0.585            |

\*Benjamini-Hochberg correction

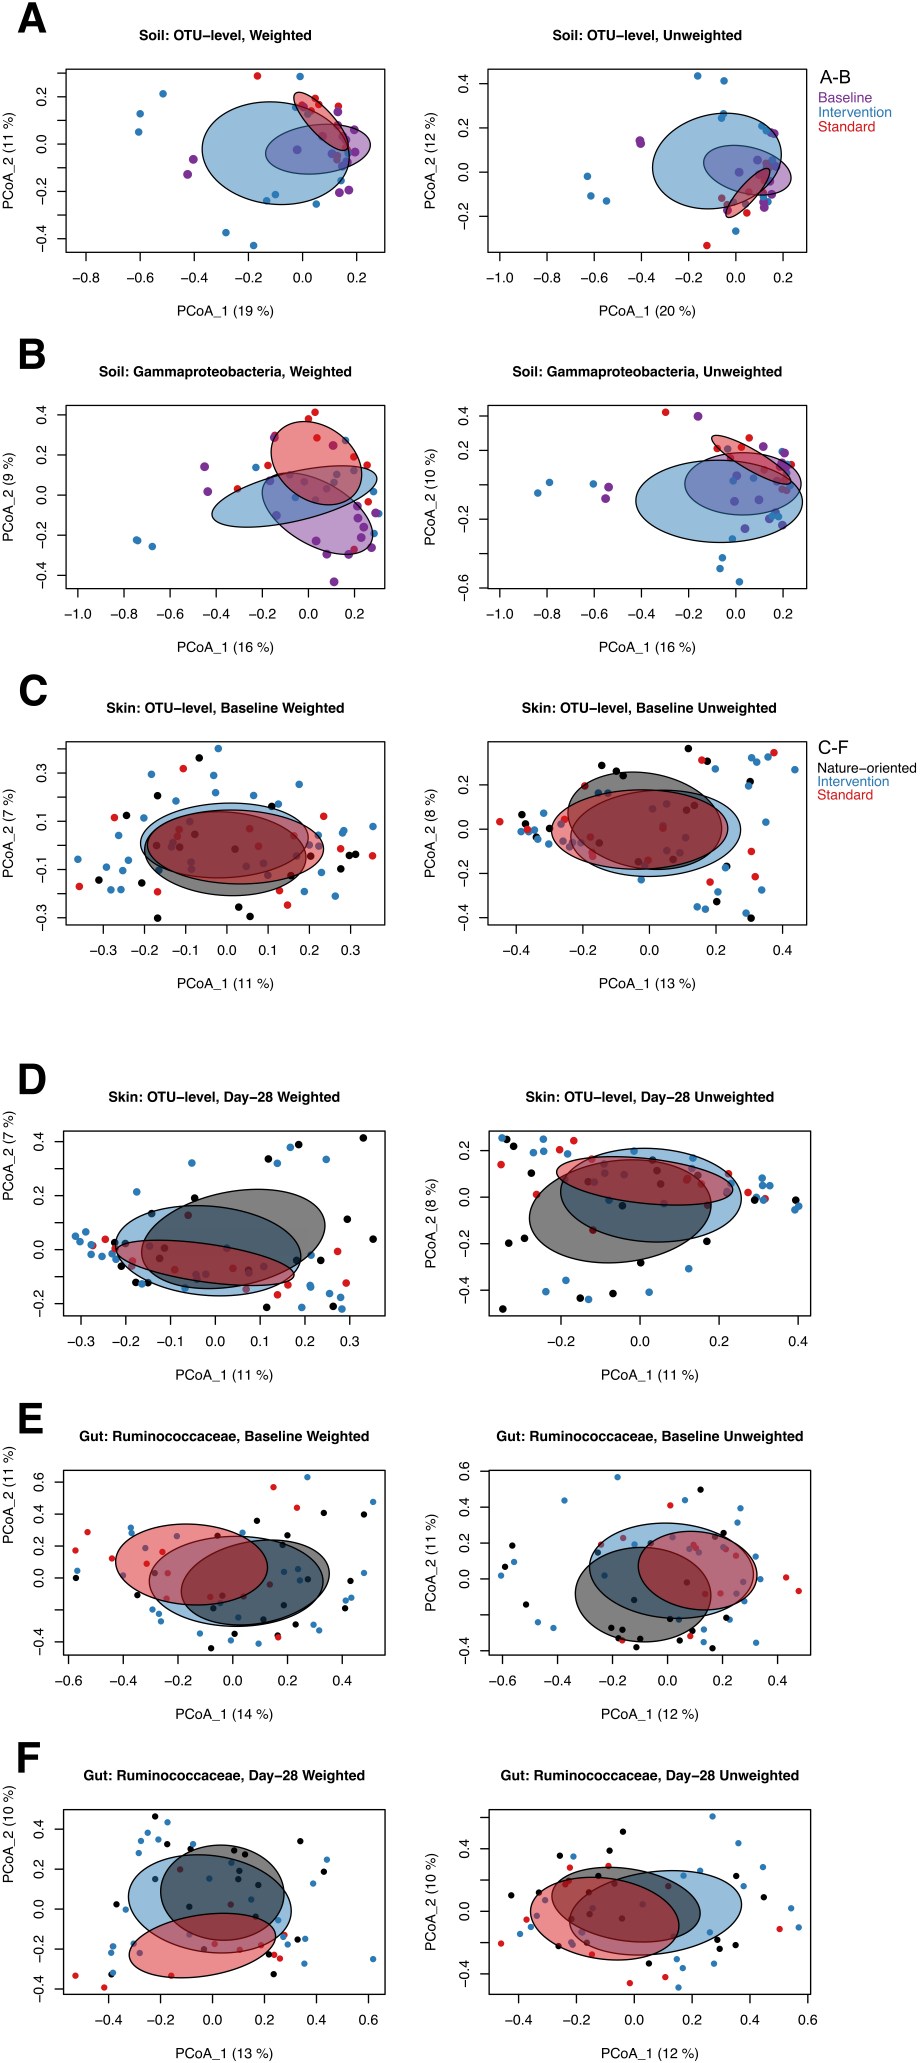

**Fig. S1. Principal Coordinate Analysis (PCoA) for differences and shifts in bacterial communities A-B) in soil, B-C) on skin and E-F) in the gut.** PCoA plots were calculated with dissimilarity indices with Bray-Curtis metric for weighted (abundance data) and unweighted (presence/absence data) data sets. For details of significant differences, please see Table S2. After the intervention period, **(A)** standard and intervention yards had different weighted and unweighted total bacterial and **(B)** Gammaproteobacterial community composition in soil. **(C)** Skin total bacterial community differed before intervention period between children in nature-oriented and standard daycares, **(D)** but not after intervention. In the gut, the sole difference at baseline was found **(E)** between nature-oriented and standard children in Ruminococcaceae community before intervention, while **(F)** after the intervention period Ruminococcaceae community was different additionally between the intervention and standard children.

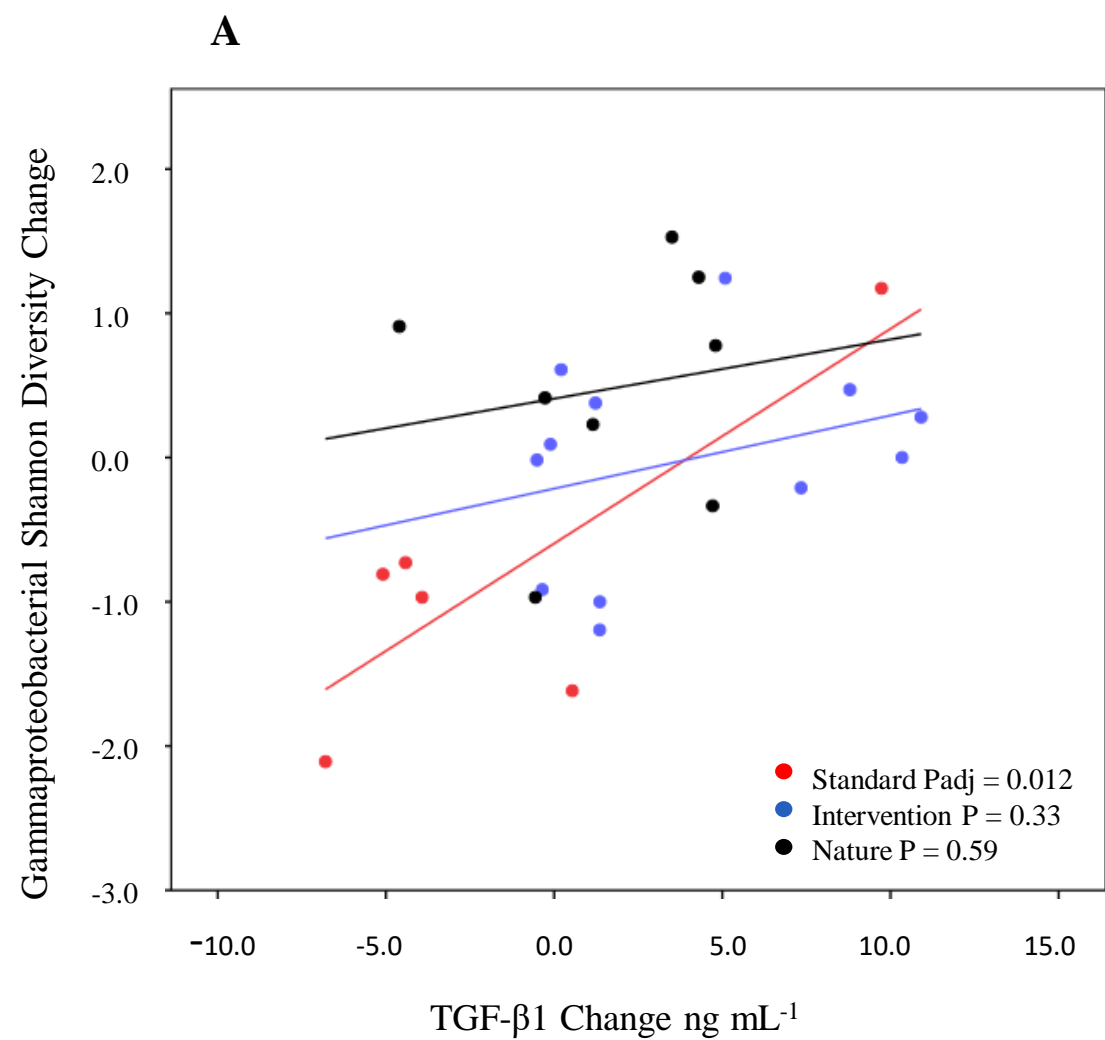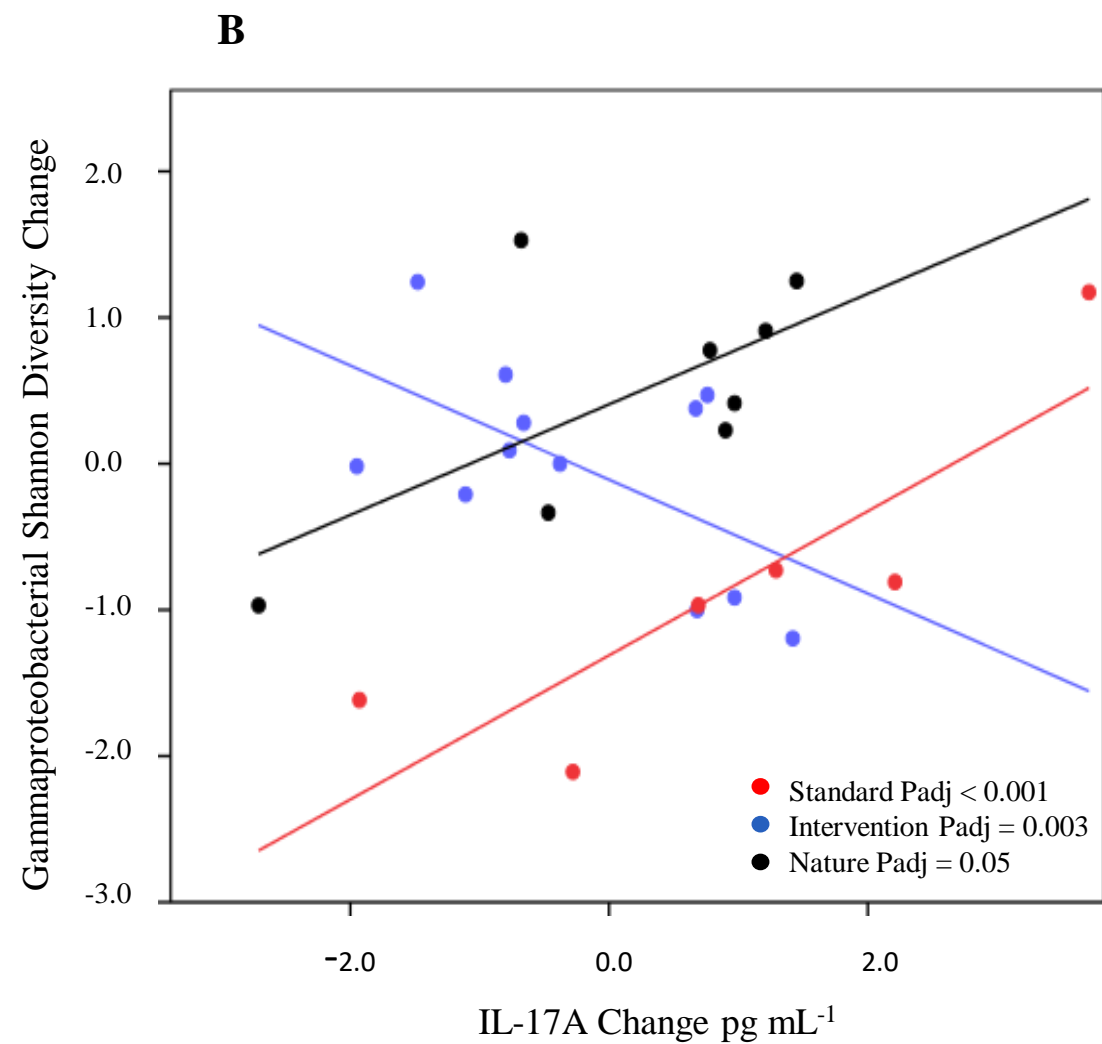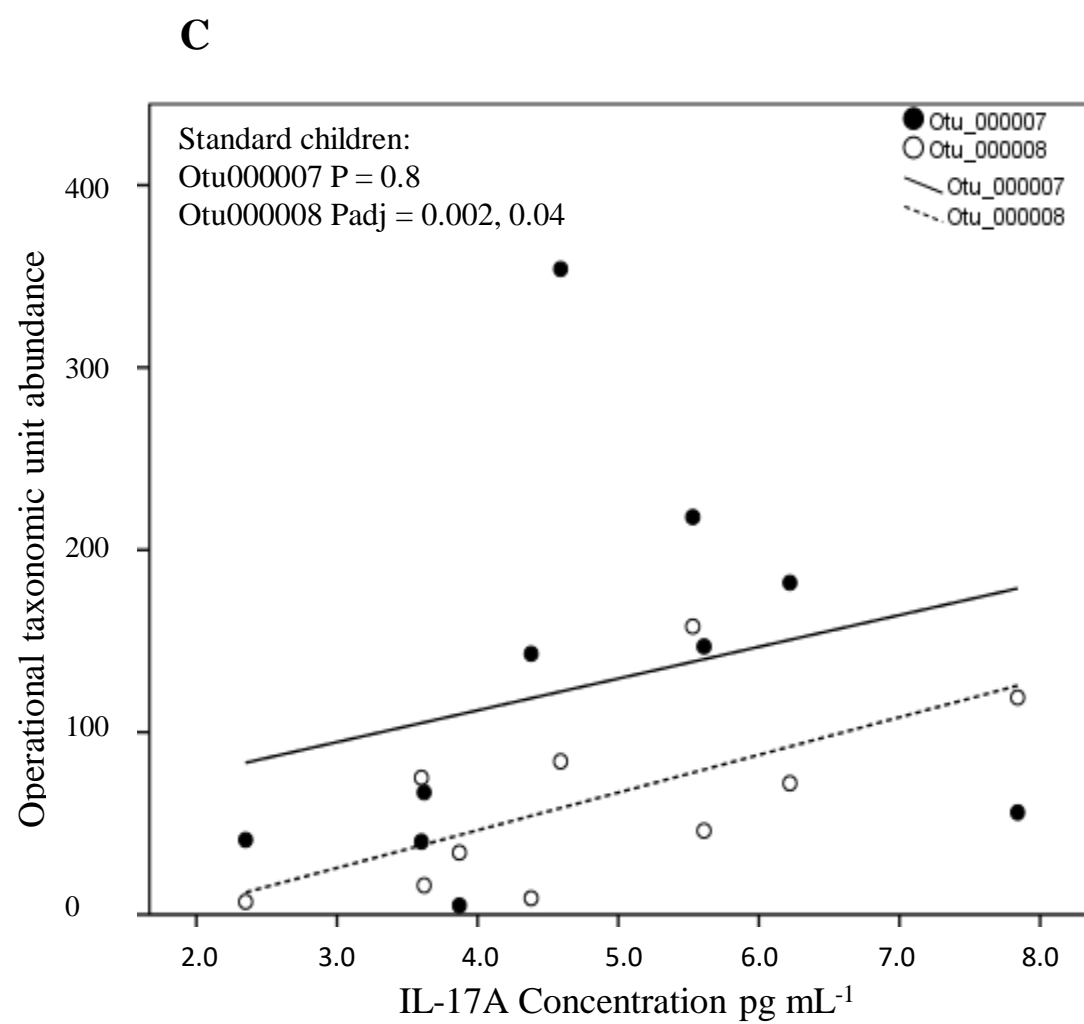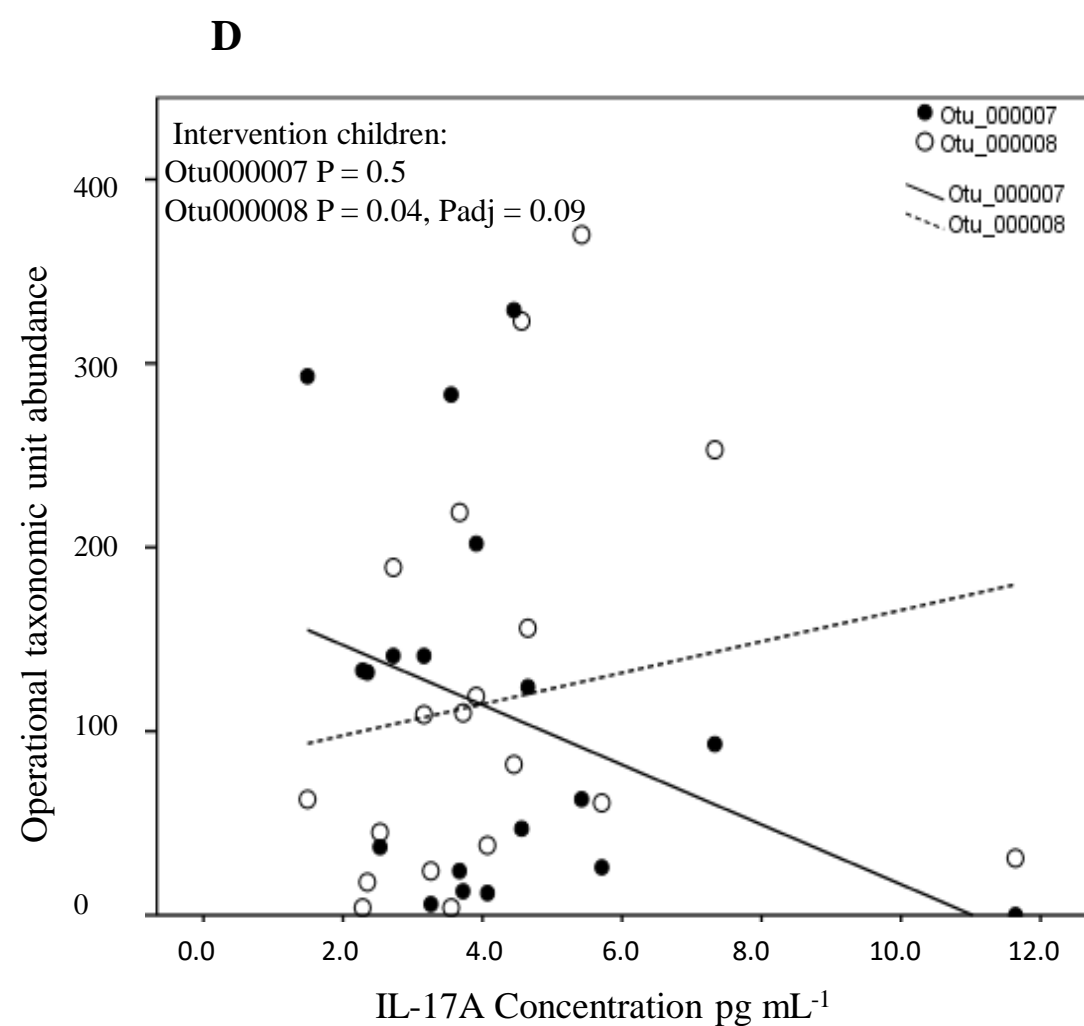



**Fig. S2. Associations between change in A-B) skin Gammaproteobacterial diversity and C-D) gut Faecalibacterium OTUs, and immune markers.** Skin Gammaproteobacterial diversity change was associated with plasma (A) TGF- $\beta$ 1 (ng mL<sup>-1</sup>) and (B) IL-17A (pg mL<sup>-1</sup>) change among children in standard, intervention and nature-oriented daycares. (C) Among standard and (D) intervention children, *Faecalibacterium* Otu000008 was associated with an increase in IL-17A concentration (results from end of trial). Skin alpha diversity (Shannon index) and immune markers were measured on days 0 and 28 (change = day 28 – day 0).
